## REVIEW

# Arthropod segmentation

Erik Clark<sup>1,2,\*</sup>, Andrew D. Peel<sup>3</sup> and Michael Akam<sup>2</sup>

## ABSTRACT

There is now compelling evidence that many arthropods pattern their segments using a clock-and-wavefront mechanism, analogous to that operating during vertebrate somitogenesis. In this Review, we discuss how the arthropod segmentation clock generates a repeating sequence of pair-rule gene expression, and how this is converted into a segment-polarity pattern by ‘timing factor’ wavefronts associated with axial extension. We argue that the gene regulatory network that patterns segments may be relatively conserved, although the timing of segmentation varies widely, and double-segment periodicity appears to have evolved at least twice. Finally, we describe how the repeated evolution of a simultaneous (*Drosophila*-like) mode of segmentation within holometabolon insects can be explained by heterochronic shifts in timing factor expression plus extensive pre-patterning of the pair-rule genes.

**KEY WORDS:** Arthropods, Segmentation, Patterning, Pair-rule genes, *Drosophila*, *Tribolium*

## Introduction

Arthropods are an ecdysozoan phylum defined by their segmented bodies and jointed limbs. True arthropods (euarthropods) comprise three living clades: Chelicerata (spiders, scorpions and mites), Myriapoda (centipedes and millipedes), and Pancrustacea (crustaceans and insects). The closest relatives of arthropods are onychophorans (velvet worms) and tardigrades (water bears); together these phyla form the segmented superphylum Panarthropoda (Fig. 1A).

The great diversity of arthropod species is testament to the evolutionary potential of a segmented body plan: a modular organisation of fundamentally similar units arrayed serially along the anteroposterior (AP) axis (Hannibal and Patel, 2013). Arthropod segments, and their associated appendages, have diversified remarkably through adaptation to specific functions, such as feeding, locomotion or reproduction. In addition, segment number can vary enormously, from fewer than 20 in insects and malacostracan crustaceans, to over 100 in certain centipedes and millipedes, resulting in a wide spectrum of organismal forms (Brusca et al., 2016). With over a million named species, arthropods have colonised and exploited almost every environment on Earth, thanks in no small part to the evolution of segmentation.

Our understanding of how segments are patterned in arthropod embryos has traditionally been heavily influenced by study of the fruit fly *Drosophila melanogaster*. Over the past two decades, research into sequentially segmenting species has complemented the well-established *Drosophila* model, resulting in the discovery of an arthropod ‘segmentation clock’, and an outline of conserved and divergent aspects of arthropod segment patterning networks. In the light of these findings, recent studies have re-examined segmentation in *Drosophila*, uncovering new subtleties and interpreting their evolutionary significance.

In the sections that follow, we provide a general overview of arthropod segmentation and review our current understanding of three key issues: (1) the nature of the arthropod segmentation clock; (2) how the ‘pair-rule’ genes pattern segments; and (3) the evolution of *Drosophila*-style simultaneous segmentation from a sequentially segmenting ancestral state. We also reflect on the origins of arthropod segmentation (Box 1) and the control of segment number (Box 2). As we have chosen to focus on the time window when segments are actively being patterned, we do not discuss earlier AP patterning processes, such as axis specification, or later ones, such as segment morphogenesis.

## Overview of arthropod segmentation

### Segments and parasegments

In arthropods, morphological segmentation is built upon a more fundamental developmental unit, the ‘parasegment’ (Martinez-Arias and Lawrence, 1985). Parasegment boundaries are established during embryogenesis by ‘segment-polarity’ genes, such as *engrailed* and *wingless*, which are expressed in a series of persistent stripes along the AP axis. Interestingly, parasegments are offset slightly from morphological segments: parasegment boundaries fall at the anterior edge of each *engrailed* domain and line up with the middle of each appendage, whereas segment boundaries fall at the posterior edge of each *engrailed* domain and lie in between the appendages (Fig. 1B). Analogous to vertebrate ‘resegmentation’ (each vertebra being formed from portions of two different somite pairs), this developmental phase shift makes sense if the role of the parasegments is chiefly to organise the nervous system and associated appendicular structures, whereas the role of morphological segmentation is to protect these centres and form exoskeletal articulations between them (Deutsch, 2004).

Each segment-polarity gene is expressed at a particular position within a segmental unit, and the overall arrangement is remarkably conserved across Panarthropoda (Damen, 2002; Janssen and Budd, 2013). A central goal of segmentation research is to understand how upstream regulatory processes establish this important pattern within the embryo.

### Sequential segmentation and the segment addition zone

Most arthropods pattern their segments sequentially, from head to tail, coupling the segmentation process to progressive axial extension (Sander, 1976). They usually specify some number of anterior segments in the blastoderm, but the majority of the

<sup>1</sup>Department of Systems Biology, Harvard Medical School, Boston, MA 02115, USA. <sup>2</sup>Department of Zoology, University of Cambridge, Cambridge, CB2 3EJ, UK. <sup>3</sup>School of Biological Sciences, Faculty of Biological Sciences, University of Leeds, Leeds, LS2 9JT, UK.

\*Author for correspondence (erik\_clark@hms.harvard.edu)

© E.C., 0000-0002-5588-796X; A.D.P., 0000-0002-9914-3508; M.A., 0000-0003-0063-2297

This is an Open Access article distributed under the terms of the Creative Commons Attribution License (<https://creativecommons.org/licenses/by/4.0>), which permits unrestricted use, distribution and reproduction in any medium provided that the original work is properly attributed.

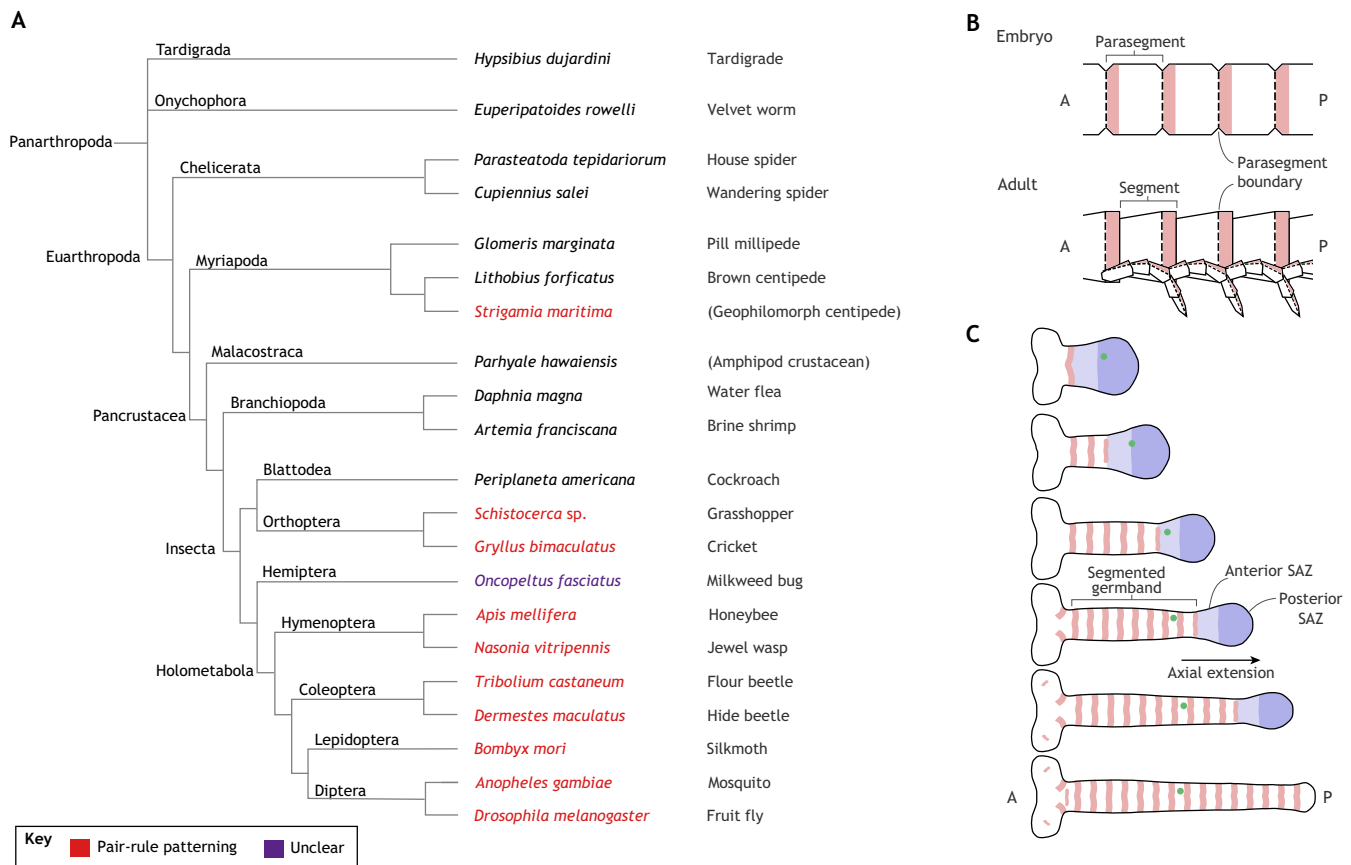

**Fig. 1. Overview of arthropod segmentation.** (A) Phylogenetic tree of notable arthropod model species (based on Misof et al., 2014; Schwentner et al., 2017). Red text indicates species known to use pair-rule patterning; the status of *Oncopeltus* is currently unclear. Branch lengths not to scale. (B) Diagram showing the relationship between parasegments and segments. Pink represents *engrailed* expression. A, anterior; P, posterior. (C) Schematic time series of an arthropod embryo undergoing sequential segmentation. *engrailed* stripes (pink) emerge sequentially from a retracting segment addition zone (SAZ, blue) as the germband extends posteriorly. Green dots mark the progress of a specific individual cell that starts in the posterior SAZ (dark blue), transiently forms part of the anterior SAZ (light blue), and ends up in the segmented germband.

segments emerge rhythmically from a posterior ‘segment addition zone’ (SAZ) after the blastoderm-to-germband transition. The SAZ retracts posteriorly as new segments are added to the trunk, generally shrinking in size, until the embryo reaches full germband extension (Fig. 1C).

‘SAZ’ is now preferred over the traditional term ‘growth zone’, because it makes no assumption of localised and continuous cell proliferation in the posterior of the embryo (Janssen et al., 2010). The material for new segments is generally provided by a combination of cell division and convergent extension, but – as in vertebrates – the relative contributions of these cell behaviours to axial elongation vary widely across species (Auman et al., 2017; Benton, 2018; Benton et al., 2016; Mito et al., 2011; Nakamoto et al., 2015; Steventon et al., 2016). Accordingly, although cell division may in some species be coordinated with segment addition, segment patterning processes do not appear to be mechanically dependent on the cell cycle (Cepeda et al., 2017), aside from in special cases such as malacostracan crustaceans. This group exhibits a highly derived mode of segmentation in which patterning occurs through regimented asymmetrical divisions of rows of posterior cells (Scholtz, 1992).

Although the shape, size and proportions of the SAZ vary considerably across species, certain features are conserved. Segment-polarity stripes emerge at the anterior of the SAZ, and

Wnt is expressed at its posterior (Williams and Nagy, 2017). Between these limits, we define the ‘anterior SAZ’ as the portion of the SAZ that contains segments in the process of being patterned, and the ‘posterior SAZ’ as the portion that contains cells not yet assigned to any particular prospective segment. These functionally defined regions correlate with the differential expression of key developmental transcription factors; for example, Caudal (the arthropod homologue of the vertebrate Cdx proteins) appears to be specifically associated with the posterior SAZ (Auman et al., 2017; Clark and Peel, 2018).

Importantly, SAZ identity is transient and dynamic for any given cell. With the generation of each new segment, newly patterned tissue ‘leaves’ the anterior SAZ, which is simultaneously ‘replenished’ by cells from the posterior SAZ. (Whether cells flow anteriorly out of the SAZ or the SAZ retracts posteriorly along the embryo depends on one’s choice of reference frame.) Thus, a cell that starts out within the posterior SAZ, expressing one set of genes, will at some point end up within the anterior SAZ, expressing a different set of genes, and finally within the segmented germband, expressing yet another (Fig. 1C). This provides a mechanistic explanation for the tight coupling between axial elongation and the segmentation process, because the changing expression levels of SAZ-associated factors such as Caudal are likely to trigger coordinated expression changes in segment patterning

genes as the SAZ retracts (Clark and Peel, 2018; El-Sherif et al., 2014).

### Segment patterning by a clock-and-wavefront mechanism

Arthropod segmentation is frequently compared to vertebrate somitogenesis (reviewed by Hubaud and Pourquié, 2014; Oates et al., 2012). Although segments and somites are not homologous morphological structures, it is now becoming clear that both arthropods and vertebrates have converged on a ‘clock-and-wavefront’ strategy (Cooke and Zeeman, 1976) to pattern their AP axis. Temporal periodicity is generated by an oscillator (the ‘clock’), and progressively translated into spatial periodicity by a second signal (the ‘wavefront’), which travels along an axis and freezes (or reads out) the phase of the clock.

In vertebrates, the clock consists of cycles of gene expression in the presomitic mesoderm (PSM), whereas in arthropods it consists of cycles of gene expression in the posterior ectoderm. In both the vertebrate anterior PSM and the arthropod anterior SAZ, the oscillations are slowed by the retraction of posterior signals associated with axial extension, converting them into a series of stripes. These stripes then pattern other genes, which determine the AP polarity of somites (in vertebrates) or segments (in arthropods).

Curiously, the periodicity of the segmentation clock is not fixed across arthropods. Most groups pattern a single new segment for each cycle of the clock (as do vertebrates), but some species pattern two segments in each cycle, meaning that their clocks have a double-segment (or ‘pair-rule’) periodicity (Chipman et al., 2004; Sarrazin et al., 2012).

### Other modes of segmentation

The sequential mode of segmentation is widespread and almost certainly ancestral within arthropods. However, across species the timing of segmentation can vary dramatically relative to other developmental events.

For example, arthropod embryos differ widely in the number of segments they pattern at the blastoderm stage, versus afterwards during germband extension. In insects, this variation is roughly correlated with a spectrum of ‘germ types’ defined in the pre-molecular era (Davis and Patel, 2002; Krause, 1939), but for simplicity and generality, we have chosen to eschew such terminology in this Review. Instead, we will refer to sequential segmentation (usually occurring in a germband, under the control of a segmentation clock) versus simultaneous segmentation (usually occurring in a blastoderm, downstream of non-periodic spatial cues). The mechanisms underlying simultaneous segmentation are discussed in more detail below.

Outside of the insects, many arthropod groups undergo post-embryonic segmentation, i.e. delay the development of a portion of the AP axis until after hatching. In crustaceans with naupliar larvae, for example, only the head segments are patterned in the embryo, and trunk segments develop sequentially from a SAZ-like region after the larva has begun feeding (Anderson, 1973). Other, less extreme, examples are found within myriapods: these pattern the head and the first trunk segments in the embryo, but may add one or more trunk segments after each moult (Blower, 1985).

Our focus here is on the segmentation of the trunk (i.e. the axial patterning of the gnathal, thoracic and abdominal segments), but note that there are other parts of the arthropod body that are segmented by different mechanisms, such as the anterior head (Posnien et al., 2010) or the jointed appendages (Angelini and Kaufman, 2005a). Within the trunk itself, the mechanisms we describe specifically control ectodermal segmentation; mesodermal

segmentation occurs later, apparently directed by inductive signals from the segmented ectoderm (Azpiazu et al., 1996; Green and Akam, 2013; Hannibal et al., 2012). Finally, there is evidence that dorsal segmentation in millipedes is decoupled from ventral segmentation, which later leads to segment fusions (Janssen, 2011; Janssen et al., 2004).

### Segment patterning genes

Most of the arthropod segmentation genes we know about were originally identified from a genetic screen in *Drosophila* (Nüsslein-Volhard and Wieschaus, 1980). *Drosophila* represents an extreme example of simultaneous segmentation, patterning all but its most terminal segments in the blastoderm. It has taught us a lot about how segmentation genes regulate one another’s expression (Akam, 1987; Nasiadka et al., 2002), but studies in other arthropods were (and are) necessary to reveal how these networks relate to more ancestral modes of segmentation (Peel et al., 2005).

In *Drosophila*, as in other arthropods, the segment-polarity genes are patterned by the pair-rule genes, which code for various transcription factors. In *Drosophila*, the pair-rule genes are expressed in stripes in the blastoderm, but in sequentially segmenting species they are also expressed in the SAZ (Patel et al., 1994). In general, the pair-rule genes that turn on earliest in *Drosophila* (‘primary’ pair-rule genes) are expressed in the posterior SAZ in sequentially segmenting species, and may

#### Box 1. The evolutionary origins of arthropod segmentation

The major segmented phyla – arthropods, annelids and chordates – are evolutionarily distant and separated by many unsegmented groups. Although losses of segmentation are possible in evolution (e.g. from spoon worms and peanut worms within annelids), we are sceptical about the existence of a segmented urbilaterian ancestor that could have given rise to all three phyla (Couso, 2009). Instead, segmentation appears to have evolved repeatedly during animal evolution, involving various developmental mechanisms (Graham et al., 2014).

Some of the developmental commonalities between different segmented phyla may reflect bilaterian homologies that predate segmentation itself, such as elongation of the body from a posterior zone (Jacobs et al., 2005; Martin and Kimmel, 2009). Other similarities may reflect the convergent adoption of generic patterning strategies, such as molecular oscillators (Richmond and Oates, 2012). Finally, certain similarities may reflect the parallel redeployment of ancient molecular mechanisms (Chipman, 2010), and therefore require both homology and convergence to fully explain. For example, segment boundary formation in some, but not all, annelids shows striking similarities to parasegment boundary formation in arthropods (Dray et al., 2010; Prud’homme et al., 2003; Seaver et al., 2001; Seaver and Kaneshige, 2006). Probably, this boundary specification mechanism evolved before trunk segmentation, possibly in the context of patterning the head and anterior nervous system (Vellutini and Hejnol, 2016).

The evolutionary success of segmented phyla emphasises the adaptive value of diversified metameric structures, but it does not explain why segmentation evolved in the first place. One long-standing hypothesis stresses the advantages of a segmented body for generating coordinated waves of muscular activity to drive locomotion (Clark, 1964). Given that most of the earliest arising segmented lineages have many similar segments, this seems a likely explanation for the initial origins of serial repetition along the body axis, which was likely the forerunner for metameric segmentation. Under this scenario, repetition would be expected first in the nervous system and body wall musculature. Interestingly, onychophorans have distinct mesodermal somites, and show clear parasegmental boundaries in the limbs and nervous system (Eriksson et al., 2009), but show no obvious segmentation of the body wall ectoderm.

oscillate, whereas those that turn on later ('secondary' pair-rule genes) are expressed in the anterior SAZ. The periodicity of pair-rule gene expression can be segmental or double-segmental depending on the species (in *Drosophila* it is double-segmental, hence the term 'pair-rule'), but the genes are always referred to as the 'pair-rule genes' regardless. There has been some confusion over the years as to which *Drosophila* pair-rule genes should be classed as primary and which as secondary or even tertiary. However, the most recent analysis (Schroeder et al., 2011), which classifies only *paired* (*prd*) and *sloppy paired* (*slp*) as secondary, and all of *hairy*, *even skipped* (*eve*), *runt*, *odd skipped* (*odd*) and *fushi tarazu* (*ftz*) as primary, meshes well with the comparative evidence.

In *Drosophila*, the primary pair-rule genes are patterned by the 'gap' genes, which code for another set of transcription factors. In *Drosophila*, these genes are expressed in broad, partially overlapping domains along the length of the blastoderm, but in sequentially segmenting species some portion of this pattern is generated over time, in the SAZ (Box 2). Gap genes in sequentially segmenting species do not seem to be important for directing pair-rule gene expression. They do, however, appear to play a relatively conserved role in patterning the Hox genes, which regulate segment identity (Hughes and Kaufman, 2002a; Marques-Souza et al., 2008; Martin et al., 2016).

## Nature of the arthropod segmentation clock

### Oscillating gene expression in the SAZ

Some segmentation genes exhibit extremely variable expression patterns in the posterior SAZs of fixed embryos, suggesting that they continually turn on and off over time. In the beetle *Tribolium*, split-embryo experiments have confirmed that this variability results from a temporally dynamic 'segmentation clock' within individuals rather than spatially variable expression between individuals (Sarrazin et al., 2012). Expression dynamicity has also been demonstrated in *Tribolium* by comparing the average patterns of finely staged cohorts of embryos, by visualising discrepancies between the transcript and protein domains of a given gene, and by gaining an understanding of cell dynamics within the SAZ via live imaging (Benton, 2018; El-Sherif et al., 2012; Sarrazin et al., 2012). In other species, gene expression dynamics within the SAZ have rarely been studied in detail. However, convincing 'pseudo time-series' assembled from carefully staged *Strigamia* (centipede) and *Parasteatoda* (spider) embryos imply that oscillatory dynamics are widespread (Brena and Akam, 2013; Schönauer et al., 2016).

Candidate gene approaches in species including *Tribolium*, *Strigamia*, the millipede *Glomeris*, and a second spider, *Cupiennius*, indicate that oscillating SAZ genes include the primary pair-rule genes *hairy*, *eve*, *runt* and *odd* (Choe et al., 2006; Damen et al., 2005; Green and Akam, 2013; Janssen et al., 2011). [The segmentation role of *ftz* is less widely conserved (Pick, 2016).] In addition, Notch signalling components appear to oscillate in many clades (see below), as do *prd* and *hedgehog* in spiders (Davis et al., 2005; Schoppmeier and Damen, 2005a; Schwager, 2008). However, as there has not yet been an exhaustive screen for cyclic expression, we do not know how many other genes may have been missed.

Measurements from *Tribolium* (El-Sherif et al., 2012; Nakamoto et al., 2015; Sarrazin et al., 2012) and *Strigamia* (Brena and Akam, 2012) suggest an oscillation period in these species of ~3 h at 18–20°C (or equivalently ~6 h at 13°C or ~1.5 h at 30°C, as segmentation speed scales with developmental rate). Adjusted for temperature, these numbers are comparable to the fastest

segmenting vertebrates, such as zebrafish or snakes (Gomez et al., 2008). Interestingly, the rate of segment addition is not constant throughout development (Brena and Akam, 2013; Nakamoto et al., 2015). This implies that there is stage-specific variation in the oscillation period, the axial elongation rate, and/or the dynamics of tissue maturation in the SAZ (Schröter et al., 2012; Soroldoni et al., 2014).

At present, the mechanistic basis for the oscillations is not well understood. Nonetheless, it is useful to think about contributing regulatory processes using a three-tier framework (Oates et al., 2012): (1) gene expression dynamics within cells; (2) signalling interactions between cells; and (3) the changing regulatory context along the SAZ.

### Gene expression dynamics within cells

In vertebrates such as zebrafish, (auto)repressive interactions between Her/Hes transcription factors (homologues of the *Drosophila* pair-rule gene *hairy*) are thought to form the core of the segmentation clock, driving oscillations by time-delayed negative feedback (Lewis, 2003; Schröter et al., 2012). Analogously, it is possible that the arthropod segmentation clock is driven by an intracellular negative-feedback loop formed by some or all of the oscillating pair-rule genes.

The main evidence for this is that knocking down primary pair-rule genes can block segmentation and truncate the body axis, as has been found in *Tribolium* (Choe et al., 2006), the silkworm *Bombyx* (Nakao, 2015), a second beetle species *Dermestes* (Xiang et al., 2017) and the hemipteran bug *Oncopeltus* (Auman and Chipman, 2018; Liu and Kaufman, 2005). It can also cause the expression of other primary pair-rule genes to become aperiodic (Choe et al., 2006; Nakao, 2015), suggesting that at least some of the oscillations are mutually interdependent. This observation distinguishes these knockdowns from those of downstream patterning genes, which may also yield asegmental phenotypes but do not perturb expression dynamics in the SAZ (Choe and Brown, 2007; Farzana and Brown, 2008).

The topology for a pair-rule gene segmentation clock is not clear. An early RNA interference (RNAi) study in *Tribolium* found that *eve*, *runt* or *odd* knockdown resulted in truncation, whereas *hairy* knockdown resulted only in head defects (Choe et al., 2006). This led to the hypothesis that *eve*, *runt* and *odd* are linked into a three-gene ring circuit, and that even though *hairy* oscillates in the SAZ, it is not required for segmentation. Specifically, it was proposed that *Eve* activates *runt*, *Runt* activates *odd*, and *Odd* in turn represses *eve*, returning the sequence to the beginning (Fig. 2A). However, more recent evidence has raised issues with this proposal.

First, whether *hairy* is involved in the *Tribolium* segmentation clock or not remains unclear. A later study found that *hairy* knockdown resulted in a pair-rule phenotype for gnathal and thoracic segments (Aranda et al., 2008), and the iBeetle screen (Dönitz et al., 2015) additionally recovered posterior truncations. *hairy* also has a paralogue, *deadpan*, expressed with similar dynamics in the SAZ (Aranda et al., 2008), and so its role might be masked by functional redundancy. Finally, *hairy* knockdown was recently found to produce truncations in *Dermestes* (Xiang et al., 2017), and *hairy* is also known to regulate segment patterning in the cockroach *Periplaneta* (Pueyo et al., 2008), the parasitic wasp *Nasonia* (Rosenberg et al., 2014), and of course *Drosophila*, indicating that a role in segmentation is widely conserved.

Second, whether *eve* and *odd* are part of the primary oscillator is also not certain. *eve* expression may be necessary for establishing and/or maintaining the SAZ (Cruz et al., 2010; Liu and Kaufman, 2005; Mito et al., 2007; Xiang et al., 2017), and therefore its severe truncation phenotype may be independent of its potential role in the

**A Genetic ring oscillator**

Model 1: Activation based

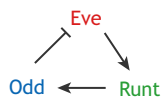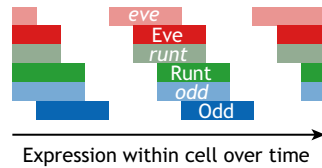

Model 2: Repression based

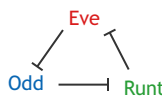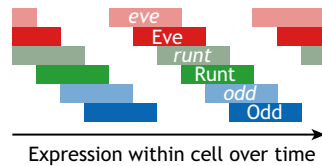

**B Hypothesis: hairy links intercellular and intracellular oscillations**

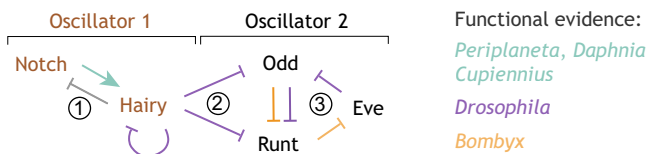

**C 'Timing factors' coordinate segment patterning across the SAZ**

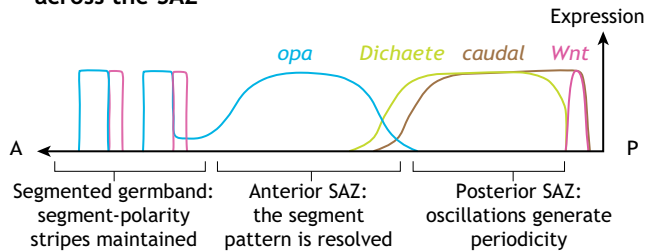

**Fig. 2. Within-cell, between-cell and tissue-level aspects of the arthropod segmentation clock.** (A) Pair-rule gene oscillations may be driven by a cross-regulatory feedback loop within cells. The two hypothetical topologies shown (left) would be capable of driving similar, although not identical, cycles of *eve*, *runt* and *odd* expression within cells (right). In *Tribolium*, the relative expression patterns of Eve protein, *runt* transcript and *odd* transcript resemble the predicted expression of model 2, rather than model 1 (see supporting information from Choe et al., 2006). Expression predictions assume Boolean regulatory logic and equal time delays for protein synthesis and protein decay (Clark, 2017). (B) Notch signalling might indirectly synchronise intracellular oscillations of *eve*, *runt* and *odd* across cells, by acting through *hairy*. This figure shows a hypothetical regulatory network, which synthesises genetic interactions documented from various different arthropod species (Clark, 2017; Eriksson et al., 2013; Nakao, 2015; Pueyo et al., 2008; Stollewerk et al., 2003). The left half of the network ('oscillator 1') would synchronise oscillations of *hairy* across neighbouring cells, by coupling *hairy* expression to Notch signalling (1). The oscillations of *hairy* would also influence the phase of the genetic ring oscillator that forms the right hand of the network ('oscillator 2'), by repressing some of its component genes (2). Cross-regulation between these components (3) would coordinate their individual expression patterns, enabling fine-scale regulation of downstream genes. (C) Genes such as *Wnt*, *caudal*, *Dichaete* and *opa* have distinct expression patterns within the SAZ, which correlate with different phases of segment patterning. A, anterior; P, posterior. (Based on *Tribolium* data from Clark and Peel, 2018.) Note: *Wnt* and *opa* have segment-polarity patterns in the segmented germband. *caudal* and/or *Dichaete* stripes (not shown) are seen in the anterior SAZ of some species, indicating that the clock feeds back on their expression (Chipman et al., 2004; Clark and Peel, 2018).

segmentation clock. *odd*, on the other hand, has been found to cause pair-rule and/or segment polarity defects rather than truncations in *Dermestes* (Xiang et al., 2017) and *Oncopeltus* (Auman and Chipman, 2018; Reding et al., 2019), although the interpretation of these phenotypes is complicated by the existence of *odd* paralogues, such as *sob*. Notably, neither *eve* nor *odd* shows dynamic expression in the posterior SAZ of *Oncopeltus* (Auman and Chipman, 2018; Liu and Kaufman, 2005), indicating that periodicity is likely to be generated by other genes in this species.

Finally, the specific regulatory interactions proposed for the circuit seem unlikely. In holometabolous insects (and also *Strigamia*), *eve*, *runt* and *odd* are expressed sequentially within each pattern repeat (Choe et al., 2006; Clark, 2017; Green and Akam, 2013; Nakao, 2015; Rosenberg et al., 2014). In both *Tribolium* and *Bombyx*, Eve is necessary for *runt* expression, and Runt is necessary for *odd* expression (Choe et al., 2006; Nakao, 2015). However, it is probably not the case that Eve directly activates *runt* and Runt directly activates *odd*, as was proposed for *Tribolium*. Instead, genetic evidence from *Bombyx* and *Drosophila* (and wild-type expression dynamics from *Tribolium*) suggest something closer to a 'repressilator' scenario (Elowitz and Leibler, 2000), where each gene in the sequence represses the one before it (Fig. 2A).

In summary, although it is likely that cross-regulation plays a considerable role in shaping dynamic pair-rule gene expression, it is not yet clear whether the oscillating genes are linked into a single circuit, whether this circuit is sufficient to generate oscillations, what the topology of this circuit is likely to be, nor indeed the extent to which it may have diverged in different lineages (Krol et al., 2011).

**Signalling interactions between cells**

Regardless of whether the pair-rule gene network is capable of producing intracellular oscillations autonomously, the segmentation clock must also involve intercellular communication to keep oscillations synchronised across the SAZ. Notch signalling, known to synchronise oscillations during vertebrate somitogenesis (Liao and Oates, 2017), is the key candidate for this role. Indeed, Notch signalling components appear to oscillate along with the pair-rule genes in chelicerates (Schoppmeier and Damen, 2005b; Stollewerk et al., 2003), myriapods (Chipman and Akam, 2008; Kadner and Stollewerk, 2004), crustaceans (Eriksson et al., 2013), and some insects (Pueyo et al., 2008), suggesting that arthropod segmentation involved Notch ancestrally.

Experiments in *Cupiennius*, *Periplaneta*, and the branchiopod crustacean *Daphnia* have found that segment boundaries and the expression of segmentation genes become disorganised when Notch signalling is perturbed (Eriksson et al., 2013; Pueyo et al., 2008; Schoppmeier and Damen, 2005b; Stollewerk et al., 2003). Inhibiting Notch signalling also blocks segmentation (but not axial elongation) in anostracan crustaceans (Williams et al., 2012). These findings indicate that Notch may play an explicit role in generating and/or coordinating pair-rule gene oscillations, perhaps via regulation of *hairy* (Fig. 2B).

However, the pleiotropy of the Notch pathway means that characterising this potential segmentation function may be difficult. During development, Notch signalling also regulates cell proliferation (Go et al., 1998), SAZ establishment (Chesebro et al., 2013; Oda et al., 2007; Schönauer et al., 2016), and fertility (Xu and Gridley, 2012). Accordingly, strong Notch perturbations in sequentially segmenting arthropods often result in uninterpretable axial truncations, or simply a failure to lay many eggs (Kux et al., 2013; Mito et al., 2011; Stahi and Chipman, 2016).

Surprisingly, in the insects *Gryllus*, *Oncopeltus* and *Tribolium*, the Notch ligand *Delta* is not expressed in the posterior SAZ (Aranda et al., 2008; Auman et al., 2017; Kainz et al., 2011). Either Notch signalling acts through a different ligand in these species, or it does not directly regulate the clock. *Delta* also does not appear to play a segmentation role in the honeybee *Apis* (a simultaneously segmenting species), even though it is expressed in stripes at an appropriate time (Wilson et al., 2010).

If a role for Notch signalling in sequential segmentation has indeed been lost in some insect lineages, it is not clear what mechanism(s) might synchronise cells instead. One possibility is the Toll genes, which are thought to influence intercellular affinity and are expressed dynamically in the SAZ across arthropods (Benton et al., 2016; Paré et al., 2014). However, they seem only to affect morphogenetic processes downstream of segment establishment, rather than segment patterning. Another possibility that has been raised is intercellular communication via Tenascin major (Ten-m) (Hunding and Baumgartner, 2017), a transmembrane protein that was erroneously identified as a *Drosophila* pair-rule factor owing to an *opa* mutation present on the balancer chromosome of its stock (Zheng et al., 2011). However, mutation/knockdown of *Ten-m* does not affect segmentation in either *Drosophila* or *Tribolium* (Choe et al., 2006; Zheng et al., 2011), and *Ten-m* is expressed periodically only after segment-polarity stripes have formed (Baumgartner et al., 1994; Jin et al., 2019).

### The changing regulatory context along the SAZ

The segmentation clock oscillates in the posterior SAZ and its phase is read out in the anterior SAZ. Therefore, the ‘wavefront’ can be loosely identified with the boundary between these regions, which retracts posteriorly across the embryo over time. The posterior SAZ and the anterior SAZ are apparently defined by the differential expression of specific regulatory factors (‘timing factors’ in our terminology), which are expressed dynamically over the course of axial elongation, determining where and when segment patterning takes place (Clark and Peel, 2018). Understanding the mechanistic basis for the wavefront therefore entails characterising (1) the identities of these factors, (2) how they regulate segmentation gene expression, and (3) how they themselves are regulated in the embryo.

Many genes are specifically expressed in subregions of the SAZ (Oberhofer et al., 2014). However, most studies to date have focused on *Wnt* and *caudal*, supplemented recently by *Dichaete/Sox21b* and *odd-paired (opa)/zic*. The expression patterns of these genes are relatively consistent across species (Fig. 2C). *Wnt* is expressed in a small zone around the proctodaeum (Janssen et al., 2010). (We note that this population of cells appears to be distinct from the SAZ proper, and may not contribute to segmental tissue.) In *Tribolium*, two of its receptors are expressed ubiquitously in the embryo, and one is expressed in the anterior SAZ and in segmental stripes (Beermann et al., 2011). *caudal* is expressed in the posterior SAZ (Copf et al., 2004; Schulz et al., 1998), and *Dichaete* is expressed in a similar zone to *caudal*, but does not overlap with posterior *Wnt* (Clark and Peel, 2018; Janssen et al., 2018; Paese et al., 2018). In contrast, *opa* is expressed in the anterior SAZ, i.e. anterior to or slightly overlapping *caudal* and *Dichaete*, and also in segmental stripes (Clark and Peel, 2018; Green and Akam, 2013; Janssen et al., 2011). Across arthropods, *Wnt*, *caudal* and *Dichaete* are required to establish and maintain the SAZ (Angelini and Kaufman, 2005b; Bolognesi et al., 2008; Chesebro et al., 2013; Copf et al., 2004; McGregor et al., 2008; Miyawaki et al., 2004; Nakao, 2018; Paese et al., 2018; Schönauer et al., 2016; Shinmyo et al., 2005). In

*Tribolium*, *opa* is required for segmentation, following earlier roles in blastoderm formation and head specification (Clark and Peel, 2018).

Caudal and *Dichaete* are strong candidates for activating the segmentation clock, as their expression domains roughly correlate with the extent of its oscillations, and they positively regulate pair-rule gene expression in *Drosophila*. *Caudal* has also been shown to be necessary for *eve* and *runt* expression in *Parasteatoda* (Schönauer et al., 2016). *Opa*, on the other hand, may be important for reading out the phase of the clock, as it activates segment polarity genes and regulates late pair-rule gene expression in *Drosophila* (Clark and Akam, 2016). Given that all three are transcription factors, they might regulate segmentation by activating or repressing specific genes, modulating the regulatory effects of other transcription factors, or switching expression control between different enhancers. However, the severity of their knockdown phenotypes in sequentially segmenting species means that uncovering the details may require precisely targeted functional perturbations, and probably transgenic reporters.

In sequentially segmenting species, the relative expression patterns of different timing factors remain consistent across development, suggesting that they regulate each other’s expression. *Wnt* is thought to act as a posterior organiser (Chesebro et al., 2013; Oberhofer et al., 2014), and we have hypothesised that regulatory interactions between *caudal*, *Dichaete* and *opa* drive their sequential expression over time (Clark and Peel, 2018). In addition, *caudal* has been found to be activated by *Wnt* in diverse arthropods (Beermann et al., 2011; Chesebro et al., 2013; McGregor et al., 2008; Miyawaki et al., 2004), whereas *Opa*, as a *Zic* factor, might physically bind the *Wnt* effector TCF and modulate its effects on downstream genes (Murgan et al., 2015; Pourebrahim et al., 2011). Therefore, although details are currently sketchy, it seems probable that the timing factors are integrated into a regulatory network that ensures the maintenance of the SAZ over time, and also governs its gradual posterior retraction. Given the numerous parallels between posterior development in arthropods and posterior development in other bilaterian phyla, a similar network might have ancestrally coordinated cell differentiation during axial extension, and only later been exploited to regulate segmentation.

In the basic clock-and-wavefront model, the clock stops abruptly when it is hit by the wavefront. However, in both arthropod segmentation and vertebrate somitogenesis, segmentation clock oscillations may resolve into narrowing travelling waves before they stabilise, indicating that the clock winds down relatively gradually. The way in which the oscillation period varies along the SAZ is described phenomenologically by a ‘frequency profile’ (Morelli et al., 2009), and this can vary over developmental time, as well as between species. Although the shape of the frequency profile is not predicted to affect segmentation rate or segment size, models suggest that a graded profile might make patterning more robust (El-Sherif et al., 2014; Vroomans et al., 2018).

*Wnt* signalling perturbations distort the size and proportions of the SAZ (as judged by the expression of *caudal*), and cause equivalent distortions to the frequency profile (as judged by the expression of *eve*) (El-Sherif et al., 2014). This indicates that *Wnt* signalling affects the dynamics of the segmentation clock, and that its effects might be mediated by SAZ timing factors. However, the mechanism for modulating the oscillation period is not clear. One hypothesis proposes that the clock is quantitatively regulated by a morphogen gradient of *Caudal* (El-Sherif et al., 2014; Zhu et al., 2017), but the effects of specific timing factors are yet to be disentangled and assessed. Currently, it is unknown whether the period of the clock is indeed explicitly determined by the concentrations of particular

timing factors (i.e. given control of these levels one could produce sustained oscillations of arbitrary period), or whether the slowing of the segmentation clock is an inherently transient phenomenon (Verd et al., 2014) inseparable from its temporal transition from an oscillating to a non-oscillating state.

**Segment patterning by the pair-rule network**

**Reading out the pattern**

In the anterior SAZ, each segmentation clock cycle resolves into an anterior-to-posterior array of partially overlapping stripes of pair-rule gene expression. Because the pair-rule genes are expressed in a strict sequence across a clock repeat (e.g. first *eve*, then *runt*, then *odd*), they convey unambiguous phase information to the cells they are expressed in, which provides significant patterning benefits over a single-gene oscillator (Fig. 3A). The internal organisation of a parasegment consists of at least three distinct segment-polarity states (Jaynes and Fujioka, 2004; Meinhardt, 1982). Therefore, each pair-

rule gene expression repeat must specify at least three output domains in species with single-segment periodicity, and at least six output domains in species with double-segment periodicity (Fig. 3B).

In *Drosophila*, the relative expression patterns of pair-rule genes and segment-polarity genes have been characterised in a variety of genetic backgrounds, allowing us to infer the regulatory interactions involved in specifying and resolving the segment pattern (reviewed by Clark and Akam, 2016; Jaynes and Fujioka, 2004). Equivalent data is generally lacking from other arthropod species. However, so far as we can tell from what does exist (mainly single or double stains in wild-type embryos) the overall process appears to be fairly conserved, at least in its broad outline (Auman and Chipman, 2018; Damen et al., 2005; Green and Akam, 2013; Xiang et al., 2017).

First, the primary pair-rule genes pattern the secondary pair-rule genes. Across arthropods, *prd* and *slp* are expressed in a conserved, partially overlapping arrangement, which aligns with prospective parasegment boundaries (Choe and Brown, 2007; Green and Akam,

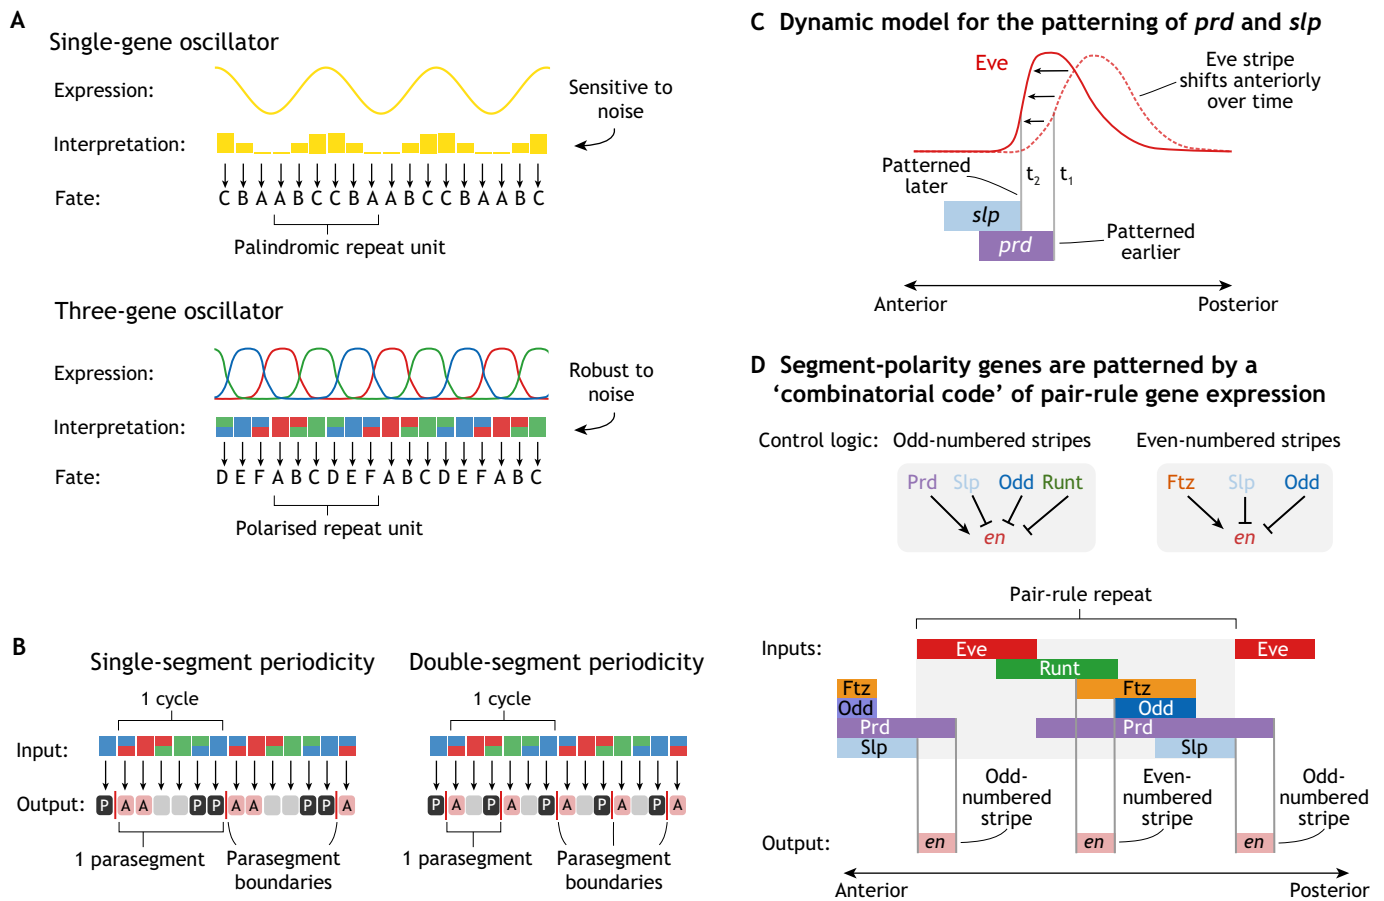

**Fig. 3. Resolving the segment pattern: from oscillations to stable stripes.** (A) Comparison of patterning using a single-gene oscillator versus patterning using a three-gene oscillator. With a single-gene oscillator, different cell fates are determined by different expression levels of the oscillator. The output is sensitive to noise in the amplitude of, or measuring of, the signal, and must be palindromic, because the input signal is symmetrical. With a three-gene oscillator, different cell fates can be determined by different combinations of input factors. The output is more robust to noise, and has an inherent polarity. (B) Comparison of the segment-polarity fate readout for three-gene oscillator clocks with single-segment or double-segment periodicity. Parasegment boundaries (red lines) form wherever a cell with an anterior segment-polarity fate ('A'; i.e. expressing *engrailed*) abuts a cell with a posterior segment-polarity fate ('P'; i.e. expressing *slp* and *wg*). A third cell fate (light grey; e.g. *odd* in *Drosophila*) prevents ectopic boundaries. Note that species with double-segment periodicity have a different, more complex mapping between the input pattern (pair-rule gene expression) and the output pattern (segment-polarity gene expression). (C) Dynamic model for the patterning of *prd* and *slp* in *Drosophila*: the staggered expression boundaries of *prd* and *slp* are caused by the Eve stripes shifting anteriorly across the tissue over time. The posterior border of the *prd* stripe is patterned at time point t<sub>1</sub> (Eve expression shown by dashed line); the posterior border of the *slp* stripe is patterned a short while later, at time point t<sub>2</sub> (Eve expression shown by solid line). (Based on Clark, 2017.) (D) The staggered pattern of pair-rule gene expression comprises a positional code, which specifies narrow stripes of segment-polarity gene expression. The regulatory logic (top) and resulting expression pattern (bottom) of *Drosophila engrailed* (*en*) is shown as an example. Note that the input pattern has double-segment periodicity, and odd-numbered and even-numbered *en* stripes are regulated differently. (Based on Jaynes and Fujioka, 2004.)

2013). In both *Drosophila* and other arthropods, *prd* turns on earlier than *slp*, at a time when upstream pair-rule gene expression is still dynamic. In *Drosophila*, both genes are patterned by Eve, and we have proposed that the dynamic nature of the Eve stripes (see below) helps differentially position the two domains (Clark, 2017) (Fig. 3C).

Next, the segment-polarity genes are activated. Each segment-polarity gene is activated or repressed by particular pair-rule factors, which combinatorially define where it is expressed within the pattern repeat (Bouchard et al., 2000; Choe and Brown, 2009; DiNardo and O'Farrell, 1987). In species with double-segment periodicity, odd-numbered and even-numbered segment-polarity stripes may be driven by different regulatory logic (Fig. 3D).

At the same time, some of the pair-rule genes also start being expressed in segment-polarity patterns. In pair-rule species, this involves the splitting of existing stripes or the intercalation of new ones. The new patterns are explained by a new network of regulatory interactions between the pair-rule genes (Clark and Akam, 2016). In contrast to the earlier network, which drives dynamic expression, this later one behaves like a multistable switch, 'locking in' specific segment-polarity fates (Clark, 2017). Interestingly, different primary pair-rule genes undergo frequency doubling in each of *Drosophila*, *Bombyx*, *Tribolium* and *Nasonia* (Choe et al., 2006; Clark and Akam, 2016; Nakao, 2015; Rosenberg et al., 2014), contrasting with the conserved expression of the segment-polarity and secondary pair-rule genes.

The resulting segmental patterns go on to regulate morphological segmentation. Note that the pair-rule genes are therefore pleiotropic: they are involved in generating the segment pattern, but some additionally play roles in maintaining segment polarity, and they also regulate the development of other structures, such as the nervous system. In some cases, these functions have become distributed between multiple paralogues, e.g. *prd/gooseberry/gooseberry-neuro* in *Drosophila* (He and Noll, 2013), or the three copies of *eve* in *Strigamia* (Green and Akam, 2013). Across species, there can be considerable variation in both the number of paralogues present in the genome and the degree of subfunctionalisation between them, complicating the interpretation of genetic perturbations.

### The evolution of pair-rule patterning

In several insect species, and also the centipede *Strigamia* (Chipman et al., 2004), segmentation gene expression undergoes a striking transition from double-segment periodicity to single-segment periodicity as the segment pattern is resolved. However, there is no indication of an initial double-segment periodicity during sequential segmentation in the spiders *Cupiennius* (Davis et al., 2005; Schoppmeier and Damen, 2005a) and *Parasteatoda* (Schwager, 2008), the millipede *Glomeris* (Janssen et al., 2011), or the crustacean *Daphnia* (Eriksson et al., 2013) (Fig. 1A). This suggests that the ancestral arthropod segmentation clock had a single-segment periodicity, and that pair-rule patterning in insects and centipedes originated independently.

Beyond this, it is not clear exactly when or how many times pair-rule patterning evolved in either of the centipede or insect lineages. *eve* is expressed segmentally rather than in pair-rule stripes in a different centipede species, *Lithobius* (Hughes and Kaufman, 2002b), which could indicate that pair-rule patterning evolved relatively recently within the centipede clade, possibly correlating with the origin of longer-bodied forms. However, the dynamics of the *Lithobius* segmentation clock will need to be investigated to rule out a transient or cryptic double-segment periodicity.

In insects, most of the available data come from holometabolans or orthopteran species, as well as the cockroach *Periplaneta* and

the hemipteran bug *Oncopeltus* (Fig. 1A). Holometabolans (Binner and Sander, 1997; Nakao, 2010; Patel et al., 1994; Rosenberg et al., 2014) and orthopterans (Davis et al., 2001; Mito et al., 2007) both show obvious transitions from double-segment to single-segment periodicity, but the mapping between the pair-rule pattern and the segmental pattern is different in the two groups, suggesting that their respective pair-rule mechanisms might have evolved independently. Consistent with this possibility, gene expression in *Periplaneta* (more closely related to orthopterans than to holometabolans) appears to be single-segmental (Pueyo et al., 2008), although, as with *Lithobius*, the dynamics of its segmentation clock have not been explicitly investigated. Finally, *Oncopeltus* is a rather strange case: based on the expression and function of *eve*, it appears to lack pair-rule patterning, but pair-rule expression and/or function of certain other genes hints at an underlying double-segment periodicity (Auman and Chipman, 2018; Benton et al., 2016; Erezilmaz et al., 2009; Liu and Kaufman, 2005; Reding et al., 2019).

Thus, although the evidence from some of these species is ambiguous, the current picture suggests that pair-rule patterning may have evolved within crown-group insects, possibly multiple times. This is puzzling, because the specialised and relatively invariant body plan of insects presents a morphological constraint that is hard to reconcile with a saltational doubling of segmentation rate. [Instead, it is much easier to imagine pair-rule patterning evolving in remipedes, which are thought to be the sister group of hexapods (Schwentner et al., 2017), and have homonomous, centipede-like bodies.] How was the evolution of double-segment periodicity coordinated with compensatory changes to Hox dynamics and the duration of axial extension, in order to keep segment number (Box 2) and segment identity constant? Given that *Strigamia* seems to switch to a single-segment periodicity when adding its most posterior segments (Brena and Akam, 2013), and that pair-rule patterns are seen during the anterior patterning of otherwise segmental species (Dearden et al., 2002; Janssen et al., 2012), one possibility is that pair-rule patterning was introduced gradually along the AP axis, allowing other developmental parameters the chance to adapt.

As pair-rule patterning requires half the number of clock cycles to generate a given number of segment-polarity stripes, its evolution may have been driven by selection for faster development (in holometabolans) or a longer body (in centipedes). However, it is currently not obvious how the ancestral segment-patterning mechanism was modified to become pair-rule. Segmental frequency could have been doubled by changing the 'readout' of a conserved clock, i.e. by evolving new enhancers to drive additional segment-polarity stripes in between the originals, or altering the control logic of existing enhancers to drive a pair of stripes instead of just one. Alternatively, the clock itself could have been modified, e.g. by recruiting new genes into the original cyclic repeat and thereby expanding its patterning potential. To reconstruct the specific regulatory changes that occurred, it will be informative to find out how the gene expression and enhancer logic of pair-rule species compares with their closest segmental relatives.

### The evolution of simultaneous segmentation

#### Reconciling sequential and simultaneous segmentation

A segmentation clock is one strategy for generating periodicity, but another is simply to regulate each stripe individually, exploiting whatever positional information is locally available (François et al., 2007; Salazar-Ciudad et al., 2001; Vroomans et al., 2016). This



### Box 2. Regulation of segment number

In arthropods, segment number is determined by the total number of pair-rule stripes (and the periodicity with which they regulate segment-polarity genes). In simultaneously segmenting insects, such as *Drosophila*, individual pair-rule stripes are positioned by gap factors at specific locations along the AP axis, hardcoding segment number. In sequentially segmenting species, segment number instead depends on the temporal duration of segmentation, divided by the period of the segmentation clock.

Gap genes appear to play some role in controlling the duration of segment addition (Cerny et al., 2005; Nakao, 2016). Over time, gap genes are expressed sequentially within the SAZ, their turnover driven by cross-regulatory interactions (Boos et al., 2018; Verd et al., 2018). This process, effectively a developmental ‘timer’, shows intriguing similarities to the ‘neuroblast clock’ (Isshiki et al., 2001; Peel et al., 2005). It evidently exerts some control over the body plan, as perturbing *hunchback* expression can both decrease (Liu and Kaufman, 2004; Marques-Souza et al., 2008; Mito et al., 2005) and increase (Boos et al., 2018; Nakao, 2016) segment number in sequentially segmenting insects. These phenotypes are not well understood, but might result from gap genes directly or indirectly regulating cell behaviour within the SAZ. Such effects are unlikely to be mediated via the Hox genes, because significant perturbations of Hox gene expression in insects and crustaceans have not been found to affect segment number (Angelini et al., 2005; Martin et al., 2016; Stuart et al., 1991).

Despite varying widely among arthropods, segment number is usually fixed within a species. However, there are certain groups, such as geophilomorph centipedes, in which naturally occurring variation might provide clues as to how this number evolves (Kettle and Arthur, 2000; Vedel et al., 2008, 2010). Another interesting question is how species that undergo post-embryonic segmentation coordinate segment patterning with the moult cycle. Ecdysone-related genes play segmentation roles in some embryos (Erezyilmaz et al., 2009; Heffer et al., 2013), suggesting that these two processes might be deeply related.

latter method is used in the *Drosophila* blastoderm, where over 20 ‘stripe-specific elements’ (SSEs) regulate the expression of the five primary pair-rule genes (Schroeder et al., 2011). These elements receive spatial information from gap factors, and each drives expression at a different AP position (or pair of positions) along the blastoderm, contributing just one or two stripes to a gene’s overall 7-stripe pattern. Sepsid flies (which diverged from drosophilids about 100 million years ago) are also known to use this kind of element (Hare et al., 2008), and it is likely that similarly ad hoc regulatory mechanisms are used wherever periodicity emerges simultaneously, e.g. in the blastoderms of *Nasonia* (Rosenberg et al., 2014) and *Oncopeltus* (Stahi and Chipman, 2016), or in the chelicerate prosoma (Pechmann et al., 2011; Schwager et al., 2009). Although less ‘elegant’ than using temporal oscillations, this explicitly spatial mode of segmentation can, in principle, occur much faster, because a number of different pattern repeats can be initialised at once.

Simultaneous segmentation, typified by *Drosophila*, is traditionally thought of as mechanistically distinct from sequential segmentation, typified by, for example, *Tribolium* or *Gryllus*. The textbook model of the hierarchical ‘subdivision’ of a syncytial blastoderm by morphogen gradients seems a world away from waves of gene expression within a cellularised, elongating germband. However, the *Drosophila* blastoderm is now known to be more dynamic than was previously imagined, and the basic structure of its segment patterning network seems remarkably similar to that of other arthropods (Fig. 4A).

As the *Drosophila* blastoderm stage is so short, the effects of dynamic gene expression are subtle, and for years were overlooked. However, quantitative expression atlases suggest that expression domains in the posterior half of the blastoderm travel anteriorly across cells over time (Jaeger et al., 2004; Keränen et al., 2006; Surkova et al., 2008), and this has recently been demonstrated through live imaging (El-Sherif and Levine, 2016; Lim et al., 2018). The shifts reflect sequential patterns of transcriptional states within cells, and trace back to asymmetric repressive interactions in the gap gene network (Jaeger, 2011; Verd et al., 2018) (Fig. 4Bi) – perhaps similar to those driving their temporal expression in the SAZs of sequentially segmenting species.

In the *Drosophila* blastoderm, the expression dynamics of the gap genes are directly transferred to pair-rule genes via their SSEs (Fig. 4Bii). In addition, the pair-rule genes cross-regulate each other through ‘zebra elements’: enhancers that drive expression in all of the trunk stripes simultaneously (Schroeder et al., 2011). (Some primary pair-rule genes, and both secondary pair-rule genes, possess zebra elements.) These regulatory interactions are also dynamic, and they combine with the stripe shifts driven by the gap genes to generate a staggered sequence of pair-rule gene expression within each double-segment repeat (Clark, 2017) (Fig. 4Biii). This spatiotemporal sequence is the same as that driven by the segmentation clock in sequentially segmenting species such as *Tribolium* and *Strigamia* (Choe et al., 2006; Green and Akam, 2013), suggesting that zebra enhancers and ‘clock’ enhancers may be homologous.

Once primary pair-rule gene expression is properly phased within each double-segment repeat, *Drosophila* segment patterning proceeds just as it would in the anterior SAZ of a sequentially segmenting species, beginning with the activation of *prd* and *slp*, and moving on to segment-polarity gene expression and stripe doubling. This conserved process of pattern resolution is apparently regulated by a conserved sequence of timing factor expression: posterior SAZ factors Caudal and Dichaete are expressed throughout the trunk during the early, dynamic stages of pair-rule gene expression in *Drosophila*, and are replaced by the anterior SAZ factor Opa as the segment-polarity pattern is being resolved (Clark and Peel, 2018).

The *Drosophila* blastoderm therefore seems effectively equivalent to a SAZ, except that rather than maturing gradually from anterior to posterior, it does so all at once (Fig. 4C). We suspect that much of the ancestral segmentation machinery remains intact. However, as spatial information is no longer conveyed by the delayed maturation of posterior tissue, gap genes and SSEs preload it into the system instead (Fig. 4A). Importantly, although genetic perturbations tend to result in different phenotypes in the two modes of segmentation (e.g. primary pair-rule genes cause pair-rule phenotypes in *Drosophila* rather than truncations), this might often be explained by the divergent deployment of the genes in the embryo, rather than divergent function.

### The evolution of stripe-specific elements

Simultaneous segmentation differs from sequential segmentation in two key respects: its temporal regulation (determined by the expression profiles of the timing factors), and the spatial pre-patterning of the pair-rule genes by gap genes (Fig. 4C). Simultaneous segmentation is also associated with an anterior shift of the blastoderm fate map and an increase in the number of segments patterned prior to gastrulation. [Note, however, that although segment patterning in the blastoderm is often simultaneous and regulated by gap genes, this need not be the case: *Tribolium*

**A** Sequential segmentation  
e.g. *Tribolium*

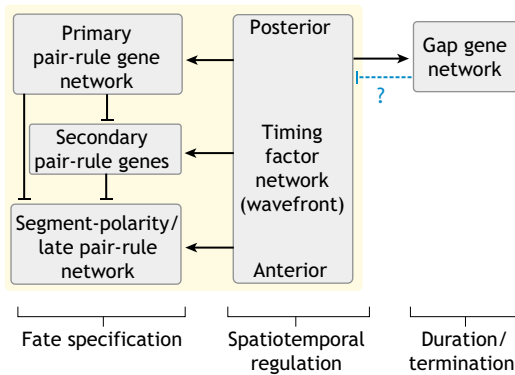

**Simultaneous segmentation**  
e.g. *Drosophila*

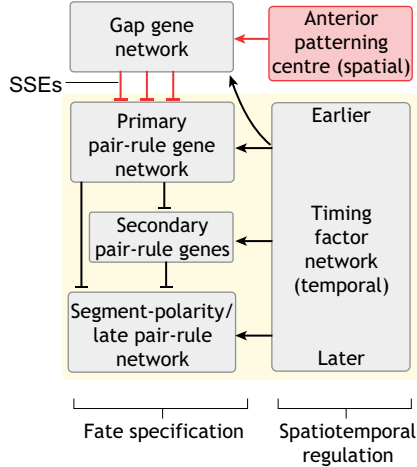

**B**  
(i) Gap gene network cross-regulation causes expression shifts  
(ii) Stripes of SSE-driven pair-rule genes shift anteriorly  
(iii) Shifts plus cross-repression organise pair-rule pattern

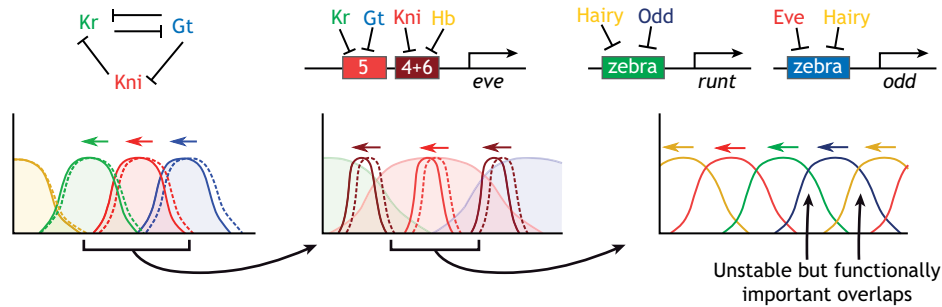

**C** Sequential segmentation

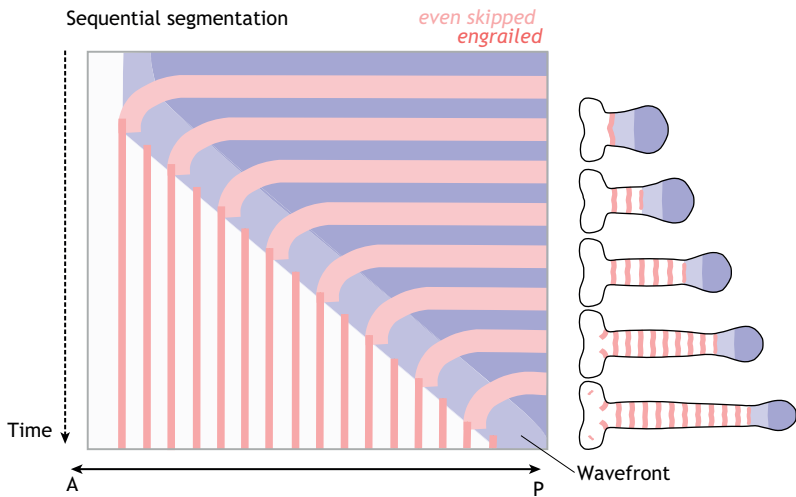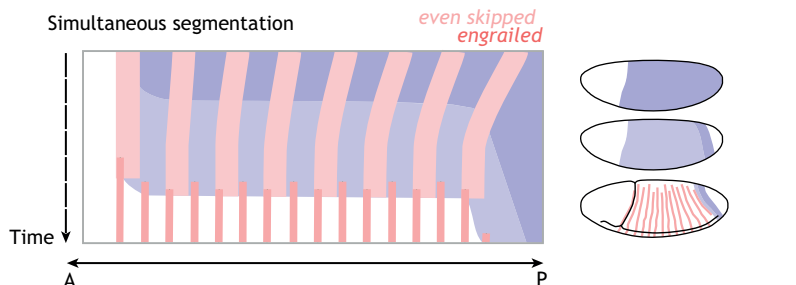

**Fig. 4. Reconciling sequential and simultaneous segmentation.**

(A) Structural overview of arthropod segmentation gene networks. The core of the system (yellow box) is relatively conserved across species. In sequential segmentation, spatial information is provided by the timing factor network, which generates a wavefront. Gap genes do not play a major role in segment patterning, although late gap gene expression may be important for terminating segmentation, by repressing timing factors that maintain the SAZ (dashed blue line). In simultaneous segmentation, timing factors only provide temporal information. Spatial information is usually provided by a novel anterior patterning centre (i.e. a morphogen gradient such as Bicoid; Liu et al., 2018; McGregor, 2005), which regulates gap gene expression. Gap genes pass this information to the primary pair-rule genes, through newly evolved regulatory elements (SSEs). (B) Spatial patterning in *Drosophila* is inherently dynamic. (i) Regulatory interactions between gap genes cause gap domains to shift anteriorly across the blastoderm over time. (ii) Stripes of pair-rule gene expression regulated by gap inputs also shift anteriorly. (iii) Regulatory interactions between the pair-rule genes convert these shifts into a staggered pattern of expression overlaps across the pair-rule repeat. Note that each panel zooms in on a smaller region of the AP axis. (C) Schematic kymographs (i.e. plots of how gene expression along the AP axis changes over time) comparing the key spatiotemporal features of sequential and simultaneous segmentation. In sequential segmentation, timing factor expression (blue) matures from anterior to posterior across the tissue, producing a wavefront (diagonal line). Periodicity is generated by sustained oscillations (note how *even skipped* turns on and off over time within the blue zone). The wavefront converts the oscillations into a stable segment-polarity pattern (*engrailed* expression). In simultaneous segmentation, there is little spatial regulation of timing factor expression across the tissue, and pair-rule stripes are present from the start. Embryo diagrams depict the specific time points they line up with on the kymographs (*eve* expression is not shown). Patterning has double-segment periodicity. Note that the two time axes have different scales.

**A Each SSE can take over from the clock gradually**

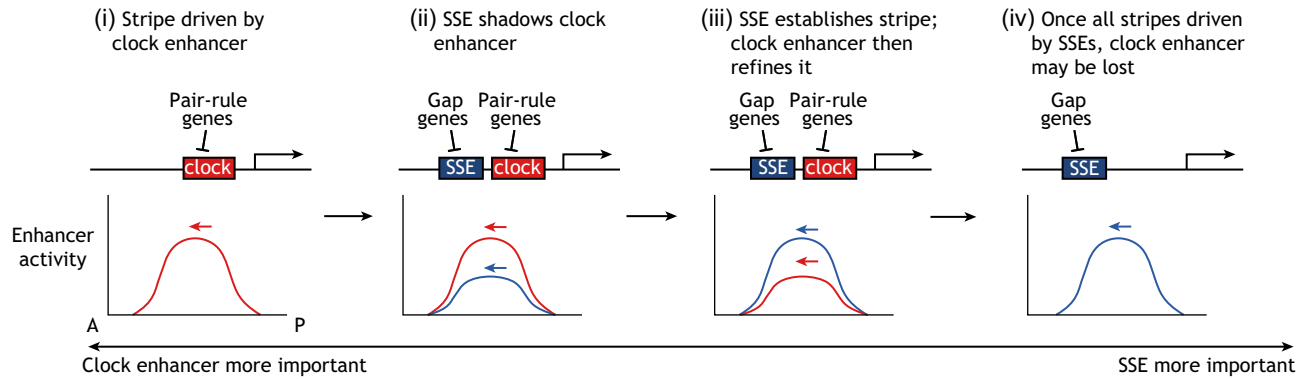

**B SSEs are able to evolve one at a time**

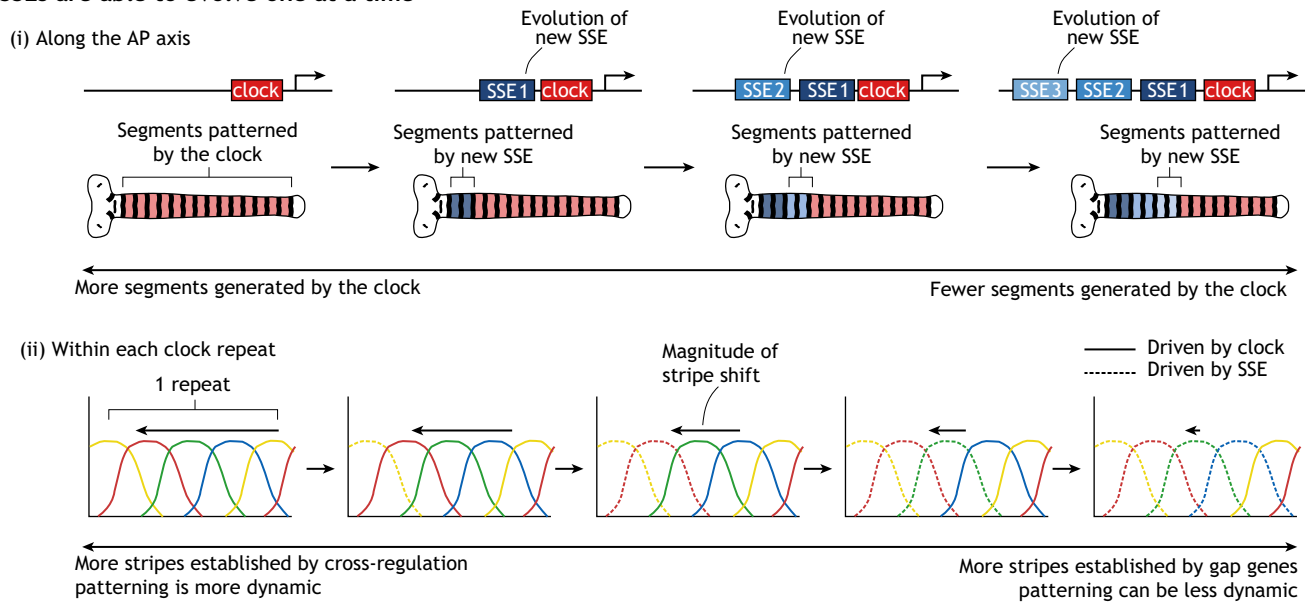

**C Existing SSEs can be recruited to drive additional stripes**

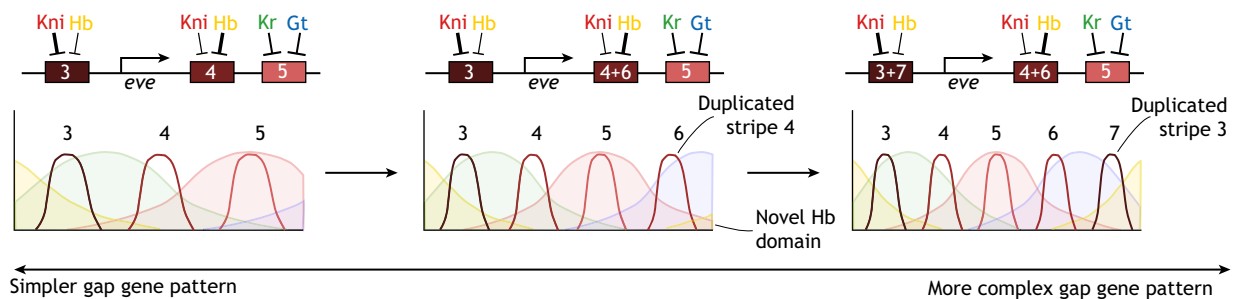

**Fig. 5. The evolution of simultaneous segmentation involves a gradual replacement of the segmentation clock by SSEs.** (A) Clock enhancers (potentially homologous to zebra elements) and SSEs both drive stripes that shift anteriorly over time. SSEs can therefore gradually assume regulatory control over particular clock-driven stripes (i-iv), without disrupting downstream patterning. (B) Simultaneous patterning is likely to evolve stepwise along the AP axis, via the acquisition over evolutionary time of new SSEs that control expression in increasingly posterior stripes. Embryo diagrams assume a segmentation clock with double-segment periodicity. In addition, simultaneous patterning is likely to evolve stepwise within each pair-rule gene expression repeat, as more of the primary pair-rule genes evolve their own SSEs. Additional SSEs reduce the time required to organise pair-rule gene expression across the repeat. As a consequence, the magnitude of the stripe shifts can decrease. (C) Changes in gap gene expression can be sufficient to generate additional SSE-driven stripes, without accompanying changes in cis-regulatory logic. In *Drosophila* (right), SSEs such as *eve* 3+7 and *eve* 4+6 each drive a pair of stripes. The current situation likely evolved from a simpler scenario (left), in which the same enhancers drive expression in only one stripe each. Gt, Giant; Hb, Hunchback; Kni, Knirps; Kr, Krüppel. Note that *eve* 3+7 and *eve* 4+6 are both repressed by Kni and Hb, but with different relative strengths, represented by different arrow thicknesses (Samee et al., 2017). Diagrams are colour-coded such that transcription factor names (top) have the same colour as their corresponding expression domain(s) (below).

patterns its blastoderm segments sequentially, using retracting timing factors and a clock (El-Sherif et al., 2014, 2012)].

The evolution of simultaneous segmentation appears to be constrained by early embryogenesis (French, 1988). Some insects, such as orthopterans, have ‘panoistic’ ovaries, in which all germline cells become oocytes, and the eggs contain little but yolk (Büning, 1994). These species pattern their segments sequentially. Other insects, such as hemipterans and holometabolans, have ‘meroistic’ ovaries, in which germline-derived ‘nurse’ cells load oocytes with maternal mRNA. These species frequently have a biphasic mode of segmentation, in which anterior segments are patterned simultaneously. Meroistic ovaries (which facilitate pre-patterning of the egg), may therefore be a pre-adaptation for simultaneous segmentation.

Extreme examples of simultaneous segmentation (e.g. *Drosophila*) have evolved independently within each of the major holometabolans orders (Davis and Patel, 2002). [Intriguingly, there has also been at least one reversion to sequential segmentation, within braconid wasps (Sucena et al., 2014)]. A *Drosophila*-like mode of segmentation likely requires far-reaching changes to early embryogenesis, such as a novel anterior patterning centre to help spatially pattern gap genes along the entire AP axis of the egg (Lynch et al., 2006) (Fig. 4A). Here, we focus on understanding how SSEs and gap genes are together able to take over stripe patterning from the clock. It seems likely that this transition to intricate spatial regulation involves a series of selectively favourable regulatory changes, which incrementally increase the speed or robustness of segmentation, while strictly preserving its output (Fig. 5).

First, new SSEs seem to be easy to evolve, because they tend to be short, with simple regulatory logic and high sequence turnover between closely related species (Hare et al., 2008; Ludwig et al., 1998). Some of them may have been selected simply to increase the robustness of segmentation clock expression; this might have occurred in either a blastoderm or a SAZ context. [There is one report from *Tribolium* suggesting the existence of SSEs that drive expression in the germband (Eckert et al., 2004)]. Importantly, because gap gene expression is inherently dynamic (whether in the blastoderm or the SAZ), SSE-regulated stripes are predicted to ‘shadow’ stripes driven by the clock, allowing them to take over downstream functions gradually (Verd et al., 2018) (Fig. 5A).

Second, only a single new SSE need evolve at one time. Simultaneous patterning seems likely to have evolved progressively, from anterior to posterior, with each new SSE-driven stripe reducing the number of cycles needed from the clock (Peel and Akam, 2003) (Fig. 5Bi). Furthermore, cross-regulation between the pair-rule genes means that an SSE for one gene could in principle go on to organise a whole pattern repeat, with the remaining genes evolving their own SSEs afterwards, to make patterning faster or more robust (Clark, 2017) (Fig. 5Bii). This process might be highly contingent: in *Drosophila*, *eve* and *runt* have full sets of SSEs and *odd* is patterned largely through cross-regulation (Schroeder et al., 2011), but RNAi evidence from *Bombyx* suggests precisely the opposite (Nakao, 2015).

Finally, SSEs can be reused. In *Drosophila* there are several SSEs that drive a pair of stripes, typically arranged symmetrically around a particular gap domain (Schroeder et al., 2011). This suggests that posterior gap gene expression evolved to duplicate the regulatory environments of anterior stripes, thereby initialising additional pair-rule gene stripes without the need to evolve additional SSEs (Fig. 5C).

Interestingly, *Drosophila eve* stripes 3 and 7, which are co-driven by a single SSE, are regulated by the same gap genes as are *eve* stripes 3 and 6 in *Anopheles* (Goltsev et al., 2004), which has led to a

proposal that certain stripes have been lost or gained from these lineages over time (Rothschild et al., 2016). This hypothesis is hard to reconcile with the gradualist scenario we favour, as the transitional states would have severely compromised fitness. We think it more likely that the posterior gap gene domains were recruited in a different order in the *Drosophila* and *Anopheles* lineages, resulting in a homologous ‘stripe 3’ element additionally driving non-homologous posterior stripes. In support of this alternative, a midge species more closely related to *Drosophila* than to *Anopheles* patterns only five *eve* stripes before gastrulation (Rohr et al., 1999), indicating that *Anopheles* and *Drosophila* probably evolved fully simultaneous segmentation independently (Jaeger, 2011).

## Conclusions

Our current understanding is that arthropod segment patterning is an inherently dynamic and a significantly conserved process, ancestrally taking the form of a clock-and-wavefront system. Note, however, that many of the conclusions in this Review extrapolate from fragmentary data gathered from a small number of model species, with functional data available from an even smaller number. This is certainly not the last word on arthropod segmentation, but we hope to have provided a coherent framework for further thought and experiment.

We anticipate that future investigation will centre on two contrasting but inter-related tasks. First, better resolving the nature of the ancestral arthropod clock-and-wavefront system: the topology of the gene regulatory networks comprising the clock, the production of timing factor wavefronts by a retracting SAZ, and the mechanistic basis for the interactions between them. Second, reconstructing how arthropod segmentation networks have diversified over time, giving rise to such remarkable novelties as simultaneous patterning and double-segment periodicity. In addition, we believe that sequentially segmenting arthropod models are well placed to complement and inform the study of vertebrate axial patterning, especially given their benefits of cost-efficiency, short generation times, experimental tractability, and relatively simple genomes.

The most pressing next step is to collect good-quality multiplexed expression data from a variety of arthropod species (Choi et al., 2018, 2016) and cross-reference this with information about tissue dynamics (Wolff et al., 2018), to better characterise how segmentation gene expression changes over space and time. Building on a solid descriptive foundation, there are numerous exciting directions to pursue: genome editing to generate mutants, misexpression constructs, and live reporters (Gilles et al., 2015; Lai et al., 2018); construction and analysis of data-informed dynamical models (Sharpe, 2017); single-cell sequencing of segmenting tissues (Griffiths et al., 2018); *ex vivo* culturing of SAZ cells (Lauschke et al., 2013). Over the past four decades, arthropod segmentation has contributed enormously to our understanding of developmental gene networks and their evolution. As we enter a new ‘golden age’ of developmental biology, we see great promise for this legacy to continue.

## Acknowledgements

We thank Olivia Tidswell, Matthew Benton, Lauren Bush, Mariana Wolfner and Roger Keynes for comments on the manuscript.

## Competing interests

The authors declare no competing or financial interests.

## Funding

The authors were supported by Biotechnology and Biological Sciences Research Council research grants (BB/P009336/1 to M.A. and E.C.; BB/L020092/1 to A.D.P.). E.C. was also supported by a Junior Research Fellowship from Trinity College, University of Cambridge, and a European Molecular Biology Organization Long Term Fellowship.

## References

- Akam, M.** (1987). The molecular basis for metameric pattern in the *Drosophila* embryo. *Development* **101**, 1–22.
- Anderson, D. T.** (1973). *Embryology and Phylogeny in Annelids and Arthropods., International series of Monographs in Pure and Applied Biology*. Oxford: Pergamon Press.
- Angelini, D. R. and Kaufman, T. C.** (2005a). Insect appendages and comparative ontogenetics. *Dev. Biol.* **286**, 57–77. doi:10.1016/j.ydbio.2005.07.006
- Angelini, D. R. and Kaufman, T. C.** (2005b). Functional analyses in the milkweed bug *Oncopeltus fasciatus* (Hemiptera) support a role for Wnt signaling in body segmentation but not appendage development. *Dev. Biol.* **283**, 409–423. doi:10.1016/j.ydbio.2005.04.034
- Angelini, D. R., Liu, P. Z., Hughes, C. L. and Kaufman, T. C.** (2005). Hox gene function and interaction in the milkweed bug *Oncopeltus fasciatus* (Hemiptera). *Dev. Biol.* **287**, 440–455. doi:10.1016/j.ydbio.2005.08.010
- Aranda, M., Marques-Souza, H., Bayer, T. and Tautz, D.** (2008). The role of the segmentation gene hairy in *Tribolium*. *Dev. Genes Evol.* **218**, 465–477. doi:10.1007/s00427-008-0240-1
- Auman, T. and Chipman, A. D.** (2018). Growth zone segmentation in the milkweed bug *Oncopeltus fasciatus* sheds light on the evolution of insect segmentation. *BMC Evol. Biol.* **18**, 178. doi:10.1186/s12862-018-1293-z
- Auman, T., Vreede, B. M. I., Weiss, A., Hester, S. D., Williams, T. A., Nagy, L. M. and Chipman, A. D.** (2017). Dynamics of growth zone patterning in the milkweed bug *Oncopeltus fasciatus*. *Development* **144**, 1896–1905. doi:10.1242/dev.142091
- Azpiazu, N., Lawrence, P. A., Vincent, J. P. and Frasch, M.** (1996). Segmentation and specification of the *Drosophila* mesoderm. *Genes Dev.* **10**, 3183–3194. doi:10.1101/gad.10.24.3183
- Baumgartner, S., Martin, D., Hagios, C. and Chiquet-Ehrismann, R.** (1994). Tenm, a *Drosophila* gene related to tenascin, is a new pair-rule gene. *EMBO J.* **13**, 3728–3740. doi:10.1002/j.1460-2075.1994.tb06682.x
- Beermann, A., Prühs, R., Lutz, R. and Schröder, R.** (2011). A context-dependent combination of Wnt receptors controls axis elongation and leg development in a short germ insect. *Development* **138**, 2793–2805. doi:10.1242/dev.063644
- Benton, M. A.** (2018). A revised understanding of *Tribolium* morphogenesis further reconciles short and long germ development. *PLoS Biol.* **16**, e2005093. doi:10.1371/journal.pbio.2005093
- Benton, M. A., Pechmann, M., Frey, N., Stappert, D., Conrads, K. H., Chen, Y.-T., Stamatakis, E., Pavlopoulos, A. and Roth, S.** (2016). Toll genes have an ancestral role in axis elongation. *Curr. Biol.* **26**, 1609–1615. doi:10.1016/j.cub.2016.04.055
- Binner, P. and Sander, K.** (1997). Pair-rule patterning in the honeybee *Apis mellifera*: expression of even-skipped combines traits known from beetles and fruitfly. *Dev. Genes Evol.* **206**, 447–454. doi:10.1007/s004270050074
- Blower, J. G.** (1985). *Millipedes, Linnean Society Synopses of the British Fauna*. London: E.J. Brill/Dr. W. Backhuys.
- Bolognesi, R., Farzana, L., Fischer, T. D. and Brown, S. J.** (2008). Multiple Wnt genes are required for segmentation in the short-germ embryo of *Tribolium castaneum*. *Curr. Biol.* **18**, 1624–1629. doi:10.1016/j.cub.2008.09.057
- Boos, A., Distler, J., Rudolf, H., Klingler, M. and El-Sherif, E.** (2018). A re-inducible gap gene cascade patterns the anterior–posterior axis of insects in a threshold-free fashion. *eLife* **7**, e41208. doi:10.7554/eLife.41208
- Bouchard, M., St-Amand, J. and Côté, S.** (2000). Combinatorial activity of pair-rule proteins on the *Drosophila* gooseberry early enhancer. *Dev. Biol.* **222**, 135–146. doi:10.1006/dbio.2000.9702
- Brena, C. and Akam, M.** (2012). The embryonic development of the centipede *Strigamia maritima*. *Dev. Biol.* **363**, 290–307. doi:10.1016/j.ydbio.2011.11.006
- Brena, C. and Akam, M.** (2013). An analysis of segmentation dynamics throughout embryogenesis in the centipede *Strigamia maritima*. *BMC Biol.* **11**, 112. doi:10.1186/1741-7007-11-112
- Brusca, R. C., Moore, W. and Shuster, S. M.** (2016). *Invertebrates*, 3rd edn. Sunderland, MA: Sinauer.
- Büning, J.** (1994). *The Insect Ovary: Ultrastructure, Previtellogenic Growth and Evolution*. Netherlands: Springer.
- Cepeda, R. E., Pardo, R. V., Macaya, C. C. and Sarrazin, A. F.** (2017). Contribution of cell proliferation to axial elongation in the red flour beetle *Tribolium castaneum*. *PLoS ONE* **12**, e0186159. doi:10.1371/journal.pone.0186159
- Cerny, A. C., Bucher, G., Schröder, R. and Klingler, M.** (2005). Breakdown of abdominal patterning in the *Tribolium* Krüppel mutant jaws. *Development* **132**, 5353–5363. doi:10.1242/dev.02154
- Chesebro, J. E., Pueyo, J. I. and Couso, J. P.** (2013). Interplay between a Wnt-dependent organiser and the Notch segmentation clock regulates posterior development in *Periplaneta americana*. *Biol. Open* **2**, 227–237. doi:10.1242/bio.20123699
- Chipman, A. D.** (2010). Parallel evolution of segmentation by co-option of ancestral gene regulatory networks. *BioEssays* **32**, 60–70. doi:10.1002/bies.200900130
- Chipman, A. D. and Akam, M.** (2008). The segmentation cascade in the centipede *Strigamia maritima*: Involvement of the Notch pathway and pair-rule gene homologues. *Dev. Biol.* **319**, 160–169. doi:10.1016/j.ydbio.2008.02.038
- Chipman, A. D., Arthur, W. and Akam, M.** (2004). A double segment periodicity underlies segment generation in centipede development. *Curr. Biol.* **14**, 1250–1255. doi:10.1016/j.cub.2004.07.026
- Choe, C. P. and Brown, S. J.** (2007). Evolutionary flexibility of pair-rule patterning revealed by functional analysis of secondary pair-rule genes, paired and sloppy-paired in the short-germ insect, *Tribolium castaneum*. *Dev. Biol.* **302**, 281–294. doi:10.1016/j.ydbio.2006.09.037
- Choe, C. P. and Brown, S. J.** (2009). Genetic regulation of engrailed and wingless in *Tribolium* segmentation and the evolution of pair-rule segmentation. *Dev. Biol.* **325**, 482–491. doi:10.1016/j.ydbio.2008.10.037
- Choe, C. P., Miller, S. C. and Brown, S. J.** (2006). A pair-rule gene circuit defines segments sequentially in the short-germ insect *Tribolium castaneum*. *Proc. Natl. Acad. Sci. USA* **103**, 6560–6564. doi:10.1073/pnas.0510440103
- Choi, H. M. T., Calvert, C. R., Husain, N., Huss, D., Barsi, J. C., Deverman, B. E., Hunter, R. C., Kato, M., Lee, S. M., Abelin, A. C. T. et al.** (2016). Mapping a multiplexed zoo of mRNA expression. *Development* **143**, 3632–3637. doi:10.1242/dev.140137
- Choi, H. M. T., Schwarzkopf, M., Fornace, M. E., Acharya, A., Artavanis, G., Stegmaier, J., Cunha, A. and Pierce, N. A.** (2018). Third-generation in situ hybridization chain reaction: multiplexed, quantitative, sensitive, versatile, robust. *Development* **145**, dev165753. doi:10.1242/dev.165753
- Clark, R. B.** (1964). *Dynamics in Metazoan Evolution: The Origin of the Coelom and Segments*. Clarendon Press.
- Clark, E.** (2017). Dynamic patterning by the *Drosophila* pair-rule network reconciles long-germ and short-germ segmentation. *PLoS Biol.* **15**, e2002439. doi:10.1371/journal.pbio.2002439
- Clark, E. and Akam, M.** (2016). Odd-paired controls frequency doubling in *Drosophila* segmentation by altering the pair-rule gene regulatory network. *eLife* **5**, e18215. doi:10.7554/eLife.18215
- Clark, E. and Peel, A. D.** (2018). Evidence for the temporal regulation of insect segmentation by a conserved sequence of transcription factors. *Development* **145**, dev155580. doi:10.1242/dev.155580
- Cooke, J. and Zeeman, E. C.** (1976). A clock and wavefront model for control of the number of repeated structures during animal morphogenesis. *J. Theor. Biol.* **58**, 455–476. doi:10.1016/S0022-5193(76)80131-2
- Copf, T., Schröder, R. and Averof, M.** (2004). Ancestral role of caudal genes in axis elongation and segmentation. *Proc. Natl. Acad. Sci. USA* **101**, 17711–17715. doi:10.1073/pnas.0407327102
- Couso, J. P.** (2009). Segmentation, metamerism and the Cambrian explosion. *Int. J. Dev. Biol.* **53**, 1305–1316. doi:10.1387/ijdb.072425jc
- Cruz, C., Maegawa, S., Weinberg, E. S., Wilson, S. W., Dawid, I. B. and Kudoh, T.** (2010). Induction and patterning of trunk and tail neural ectoderm by the homeobox gene *eve1* in zebrafish embryos. *Proc. Natl. Acad. Sci. USA* **107**, 3564–3569. doi:10.1073/pnas.1000389107
- Damen, W. G. M.** (2002). Parasegmental organization of the spider embryo implies that the parasegment is an evolutionary conserved entity in arthropod embryogenesis. *Development* **129**, 1239–1250. doi:10.3410/f.1004866.56706
- Damen, W. G. M., Janssen, R. and Prpic, N.-M.** (2005). Pair rule gene orthologs in spider segmentation. *Evol. Dev.* **7**, 618–628. doi:10.1111/j.1525-142X.2005.05065.x
- Davis, G. K. and Patel, N. H.** (2002). Short, long, and beyond: molecular and embryological approaches to insect segmentation. *Annu. Rev. Entomol.* **47**, 669–699. doi:10.1146/annurev.ento.47.091201.145251
- Davis, G. K., Jaramillo, C. A. and Patel, N. H.** (2001). Pax group III genes and the evolution of insect pair-rule patterning. *Development* **128**, 3445–3458.
- Davis, G. K., D'Alessio, J. A. and Patel, N. H.** (2005). Pax3/7 genes reveal conservation and divergence in the arthropod segmentation hierarchy. *Dev. Biol.* **285**, 169–184. doi:10.1016/j.ydbio.2005.06.014
- Dearden, P. K., Donly, C. and Grbic, M.** (2002). Expression of pair-rule gene homologues in a chelicerate: early patterning of the two-spotted spider mite *Tetranychus urticae*. *Development* **129**, 5461–5472. doi:10.1242/dev.00099
- Deutsch, J. S.** (2004). Segments and parasegments in Arthropods: a functional perspective. *BioEssays* **26**, 1117–1125. doi:10.1002/bies.20111
- DiNardo, S. and O'Farrell, P. H.** (1987). Establishment and refinement of segmental pattern in the *Drosophila* embryo: spatial control of engrailed expression by pair-rule genes. *Genes Dev.* **1**, 1212–1225. doi:10.1101/gad.1.10.1212
- Dönitz, J., Schmitt-Engel, C., Grossmann, D., Gerischer, L., Tech, M., Schoppmeier, M., Klingler, M. and Bucher, G.** (2015). iBeetle-Base: a database for RNAi phenotypes in the red flour beetle *Tribolium castaneum*. *Nucleic Acids Res.* **43**, D720–D725. doi:10.1093/nar/gku1054
- Dray, N., Tessmar-Raible, K., Le Gouar, M., Vibert, L., Christodoulou, F., Schipany, K., Guillou, A., Zantke, J., Snyman, H., Béhague, J. et al.** (2010). Hedgehog signaling regulates segment formation in the annelid *Platynereis*. *Science* **329**, 339–342. doi:10.1126/science.1188913
- Eckert, C., Aranda, M., Wolff, C. and Tautz, D.** (2004). Separable stripe enhancer elements for the pair-rule gene hairy in the beetle *Tribolium*. *EMBO Rep.* **5**, 638–642. doi:10.1038/sj.embor.7400148

- El-Sherif, E. and Levine, M. (2016). Shadow enhancers mediate dynamic shifts of gap gene expression in the *Drosophila* embryo. *Curr. Biol.* **26**, 1164–1169. doi:10.1016/j.cub.2016.02.054
- El-Sherif, E., Averof, M. and Brown, S. J. (2012). A segmentation clock operating in blastoderm and germband stages of *Tribolium* development. *Development* **139**, 4341–4346. doi:10.1242/dev.085126
- El-Sherif, E., Zhu, X., Fu, J. and Brown, S. J. (2014). Caudal regulates the spatiotemporal dynamics of pair-rule waves in *tribolium*. *PLoS Genet.* **10**, e1004677. doi:10.1371/journal.pgen.1004677
- Elowitz, M. B. and Leibler, S. (2000). A synthetic oscillatory network of transcriptional regulators. *Nature* **403**, 335. doi:10.1038/35002125
- Erezylmaz, D. F., Kelstrup, H. C. and Riddiford, L. M. (2009). The nuclear receptor E75A has a novel pair-rule-like function in patterning the milkweed bug, *Oncopeltus fasciatus*. *Dev. Biol.* **334**, 300–310. doi:10.1016/j.ydbio.2009.06.038
- Eriksson, B. J., Tait, N. N., Budd, G. E. and Akam, M. (2009). The involvement of engrailed and wingless during segmentation in the onychophoran *Euperipatoides kanangrensis* (Peripatopsidae: Onychophora) (Reid 1996). *Dev. Genes Evol.* **219**, 249–264. doi:10.1007/s00427-009-0287-7
- Eriksson, B. J., Ungerer, P. and Stollewerk, A. (2013). The function of Notch signalling in segment formation in the crustacean *Daphnia magna* (Branchiopoda). *Dev. Biol.* **383**, 321–330. doi:10.1016/j.ydbio.2013.09.021
- Farzana, L. and Brown, S. J. (2008). Hedgehog signaling pathway function conserved in *Tribolium* segmentation. *Dev. Genes Evol.* **218**, 181–192. doi:10.1007/s00427-008-0207-2
- François, P., Hakim, V. and Siggia, E. D. (2007). Deriving structure from evolution: metazoan segmentation. *Mol. Syst. Biol.* **3**, 154. doi:10.1038/msb4100192
- French, V. (1988). Gradients and insect segmentation. *Development* **104**, 3–16.
- Gilles, A. F., Schinko, J. B. and Averof, M. (2015). Efficient CRISPR-mediated gene targeting and transgene replacement in the beetle *Tribolium castaneum*. *Development* **142**, 2832–2839. doi:10.1242/dev.125054
- Go, M. J., Eastman, D. S. and Artavanis-Tsakonas, S. (1998). Cell proliferation control by Notch signaling in *Drosophila* development. *Development* **125**, 22013–22040.
- Goltsev, Y., Hsiong, W., Lanzaro, G. and Levine, M. (2004). Different combinations of gap repressors for common stripes in *Anopheles* and *Drosophila* embryos. *Dev. Biol.* **275**, 435–446. doi:10.1016/j.ydbio.2004.08.021
- Gomez, C., Özbudak, E. M., Wunderlich, J., Baumann, D., Lewis, J. and Pourquié, O. (2008). Control of segment number in vertebrate embryos. *Nature* **454**, 335–339. doi:10.1038/nature07020
- Graham, A., Butts, T., Lumsden, A. and Kiecker, C. (2014). What can vertebrates tell us about segmentation?. *EvoDevo* **5**, 24. doi:10.1186/2041-9139-5-24
- Green, J. and Akam, M. (2013). Evolution of the pair rule gene network: Insights from a centipede. *Dev. Biol.* **382**, 235–245. doi:10.1016/j.ydbio.2013.06.017
- Griffiths, J. A., Scialdone, A. and Marioni, J. C. (2018). Using single-cell genomics to understand developmental processes and cell fate decisions. *Mol. Syst. Biol.* **14**, e8046. doi:10.15252/msb.20178046
- Hannibal, R. L. and Patel, N. H. (2013). What is a segment? *EvoDevo* **4**, 35. doi:10.1186/2041-9139-4-35
- Hannibal, R. L., Price, A. L. and Patel, N. H. (2012). The functional relationship between ectodermal and mesodermal segmentation in the crustacean, *Parhyale hawaiiensis*. *Dev. Biol.* **361**, 427–438. doi:10.1016/j.ydbio.2011.09.033
- Hare, E. E., Peterson, B. K., Iyer, V. N., Meier, R. and Eisen, M. B. (2008). Sepsid even-skipped enhancers are functionally conserved in *Drosophila* despite lack of sequence conservation. *PLoS Genet.* **4**, e1000106. doi:10.1371/journal.pgen.1000106
- He, H. and Noll, M. (2013). Differential and redundant functions of gooseberry and gooseberry neuro in the central nervous system and segmentation of the *Drosophila* embryo. *Dev. Biol.* **382**, 209–223. doi:10.1016/j.ydbio.2013.05.017
- Heffer, A., Grubbs, N., Mahaffey, J. and Pick, L. (2013). The evolving role of the orphan nuclear receptor ftz-f1, a pair-rule segmentation gene. *Evol. Dev.* **15**, 406–417. doi:10.1111/ede.12050
- Hubaud, A. and Pourquié, O. (2014). Signalling dynamics in vertebrate segmentation. *Nat. Rev. Mol. Cell Biol.* **15**, 709–721. doi:10.1038/nrm3891
- Hughes, C. L. and Kaufman, T. C. (2002a). Hox genes and the evolution of the arthropod body plan1. *Evol. Dev.* **4**, 459–499. doi:10.1046/j.1525-142X.2002.02034.x
- Hughes, C. L. and Kaufman, T. C. (2002b). Exploring Myriapod Segmentation: The Expression Patterns of even-skipped, engrailed, and wingless in a Centipede. *Dev. Biol.* **247**, 47–61. doi:10.1006/dbio.2002.0683
- Hunding, A. and Baumgartner, S. (2017). Ancient role of ten-m/odx in segmentation and the transition from sequential to syncytial segmentation. *Hereditas* **154**, 8. doi:10.1186/s41065-017-0029-1
- Isshiki, T., Pearson, B., Holbrook, S. and Doe, C. Q. (2001). *Drosophila* neuroblasts sequentially express transcription factors which specify the temporal identity of their neuronal progeny. *Cell* **106**, 511–521. doi:10.1016/S0092-8674(01)00465-2
- Jacobs, D. K., Hughes, N. C., Fitz-Gibbon, S. T. and Winchell, C. J. (2005). Terminal addition, the Cambrian radiation and the Phanerozoic evolution of bilaterian form. *Evol. Dev.* **7**, 498–514. doi:10.1111/j.1525-142X.2005.05055.x
- Jaeger, J. (2011). The gap gene network. *Cell. Mol. Life Sci.* **68**, 243–274. doi:10.1007/s00018-010-0536-y
- Jaeger, J., Surkova, S., Blagov, M., Janssens, H., Kosman, D., Kozlov, K. N., Manu, Myasnikova, E., Vanario-Alonso, C. E., Samsonova, M. et al. (2004). Dynamic control of positional information in the early *Drosophila* embryo. *Nature* **430**, 368–371. doi:10.1038/nature02678
- Janssens, R. (2011). Diplosegmentation in the pill millipede *Glomeris marginata* is the result of dorsal fusion. *Evol. Dev.* **13**, 477–487. doi:10.1111/j.1525-142X.2011.00504.x
- Janssens, R. and Budd, G. E. (2013). Deciphering the onychophoran 'segmentation gene cascade': Gene expression reveals limited involvement of pair rule gene orthologs in segmentation, but a highly conserved segment polarity gene network. *Dev. Biol.* **382**, 224–234. doi:10.1016/j.ydbio.2013.07.010
- Janssens, R., Prpic, N.-M. and Damen, W. G. M. (2004). Gene expression suggests decoupled dorsal and ventral segmentation in the millipede *Glomeris marginata* (Myriapoda: Diplopoda). *Dev. Biol.* **268**, 89–104. doi:10.1016/j.ydbio.2003.12.021
- Janssens, R., Le Gouar, M., Pechmann, M., Poulin, F., Bolognesi, R., Schwager, E. E., Hopfen, C., Colbourne, J. K., Budd, G. E., Brown, S. J. et al. (2010). Conservation, loss, and redeployment of Wnt ligands in protostomes: implications for understanding the evolution of segment formation. *BMC Evol. Biol.* **10**, 374. doi:10.1186/1471-2148-10-374
- Janssen, R., Budd, G. E., Prpic, N.-M. and Damen, W. G. M. (2011). Expression of myriapod pair rule gene orthologs. *EvoDevo* **2**, 5. doi:10.1186/2041-9139-2-5
- Janssen, R., Damen, W. G. M. and Budd, G. E. (2012). Expression of pair rule gene orthologs in the blastoderm of a myriapod: evidence for pair rule-like mechanisms? *BMC Dev. Biol.* **12**, 15. doi:10.1186/1471-213X-12-15
- Janssen, R., Andersson, E., Betnér, E., Bijl, S., Fowler, W., Höök, L., Leyhr, J., Mannelqvist, A., Panara, V., Smith, K. et al. (2018). Embryonic expression patterns and phylogenetic analysis of panarthropod sox genes: insight into nervous system development, segmentation and gonadogenesis. *BMC Evol. Biol.* **18**, 88. doi:10.1186/s12862-018-1196-z
- Jaynes, J. B. and Fujioka, M. (2004). Drawing lines in the sand: even skipped et al. and parasegment boundaries. *Dev. Biol.* **269**, 609–622. doi:10.1016/j.ydbio.2004.03.001
- Jin, S., O, J., Stellabotte, F., Brown, S. J. and Choe, C. P. (2019). Expression of teneurin-m/odd Oz during segmentation in the beetle *Tribolium castaneum*. *Gene Expr. Patterns* **31**, 26–31. doi:10.1016/j.gexp.2019.01.002
- Kadner, D. and Stollewerk, A. (2004). Neurogenesis in the chilopod *Lithobius forficatus* suggests more similarities to chelicerates than to insects. *Dev. Genes Evol.* **214**, 367–379. doi:10.1007/s00427-004-0419-z
- Kainz, F., Ewen-Campen, B., Akam, M. and Extavour, C. G. (2011). Notch/Delta signalling is not required for segment generation in the basally branching insect *Gryllus bimaculatus*. *Development* **138**, 5015–5026. doi:10.1242/dev.073395
- Keränen, S. V., Fowlkes, C. C., Luengo Hendriks, C. L., Sudar, D., Knowles, D. W., Malik, J. and Biggin, M. D. (2006). Three-dimensional morphology and gene expression in the *Drosophilablastoderm* at cellular resolution II: dynamics. *Genome Biol.* **7**, R124. doi:10.1186/gb-2006-7-12-r124
- Kettle, C. and Arthur, W. (2000). Latitudinal cline in segment number in an arthropod species, *Strigamia maritima*. *Proc. R. Soc. Lond. B Biol. Sci.* **267**, 1393–1397. doi:10.1098/rspb.2000.1155
- Krause, G. (1939). Die Eitypen der Insekten. *Biol. Zentralblatt* **59**, 495–536.
- Krol, A. J., Roellig, D., Dequéant, M.-L., Tassy, O., Glynn, E., Hattem, G., Mushegian, A., Oates, A. C. and Pourquié, O. (2011). Evolutionary plasticity of segmentation clock networks. *Development* **138**, 2783–2792. doi:10.1242/dev.063834
- Kux, K., Kiparaki, M. and Delidakis, C. (2013). The two *Tribolium* E(spl) genes show evolutionarily conserved expression and function during embryonic neurogenesis. *Mech. Dev.* **130**, 207–225. doi:10.1016/j.mod.2013.02.003
- Lai, Y.-T., Deem, K. D., Borràs-Castells, F., Sambrani, N., Rudolf, H., Suryamohan, K., El-Sherif, E., Halfon, M. S., McKay, D. J. and Tomoyasu, Y. (2018). Enhancer identification and activity evaluation in the red flour beetle, *Tribolium castaneum*. *Development* **145**, dev160663. doi:10.1242/dev.160663
- Lauschke, V. M., Tsiaris, C. D., François, P. and Aulehla, A. (2013). Scaling of embryonic patterning based on phase-gradient encoding. *Nature* **493**, 101–105. doi:10.1038/nature11804
- Lewis, J. (2003). Autoinhibition with transcriptional delay: a simple mechanism for the zebrafish somitogenesis oscillator. *Curr. Biol.* **13**, 1398–1408. doi:10.1016/S0960-9822(03)00534-7
- Liao, B.-K. and Oates, A. C. (2017). Delta-Notch signalling in segmentation. *Arthropod Struct. Dev.* **46**, 429–447. doi:10.1016/j.asd.2016.11.007
- Lim, B., Fukaya, T., Heist, T. and Levine, M. (2018). Temporal dynamics of pair-rule stripes in living *Drosophila* embryos. *Proc. Natl. Acad. Sci. USA* **115**, 8376–8381. doi:10.1073/pnas.1810430115
- Liu, P. Z. and Kaufman, T. C. (2004). Hunchback is required for suppression of abdominal identity, and for proper germband growth and segmentation in the intermediate germband insect *Oncopeltus fasciatus*. *Development* **131**, 1515–1527. doi:10.1242/dev.01046
- Liu, P. Z. and Kaufman, T. C. (2005). even-skipped is not a pair-rule gene but has segmental and gap-like functions in *Oncopeltus fasciatus*, an intermediate germband insect. *Development* **132**, 2081–2092. doi:10.1242/dev.01807

- Liu, Q., Onal, P., Datta, R. R., Rogers, J. M., Schmidt-Ott, U., Bulyk, M. L., Small, S. and Thornton, J. W. (2018). Ancient mechanisms for the evolution of the bicoid homeodomain's function in fly development. *eLife* **7**, e34594. doi:10.7554/eLife.34594
- Ludwig, M. Z., Patel, N. H. and Kreitman, M. (1998). Functional analysis of eve stripe 2 enhancer evolution in Drosophila: rules governing conservation and change. *Development* **125**, 949-958.
- Lynch, J. A., Brent, A. E., Leaf, D. S., Pultz, M. A. and Desplan, C. (2006). Localized maternal orthodenticle patterns anterior and posterior in the long germ wasp *Nasonia*. *Nature* **439**, 728-732. doi:10.1038/nature04445
- Marques-Souza, H., Aranda, M. and Tautz, D. (2008). Delimiting the conserved features of hunchback function for the trunk organization of insects. *Development* **135**, 881-888. doi:10.1242/dev.018317
- Martin, B. L. and Kimelman, D. (2009). Wnt signaling and the evolution of embryonic posterior development. *Curr. Biol.* **19**, R215-R219. doi:10.1016/j.cub.2009.01.052
- Martin, A., Serano, J. M., Jarvis, E., Bruce, H. S., Wang, J., Ray, S., Barker, C. A., O'Connell, L. C. and Patel, N. H. (2016). CRISPR/Cas9 mutagenesis reveals versatile roles of Hox genes in crustacean limb specification and evolution. *Curr. Biol.* **26**, 14-26. doi:10.1016/j.cub.2015.11.021
- Martinez-Arias, A. and Lawrence, P. A. (1985). Parasegments and compartments in the Drosophila embryo. *Nature* **313**, 639-642. doi:10.1038/313639a0
- McGregor, A. P. (2005). How to get ahead: the origin, evolution and function of bicoid. *BioEssays* **27**, 904-913. doi:10.1002/bies.20285
- McGregor, A. P., Pechmann, M., Schwager, E. E., Feitosa, N. M., Kruck, S., Aranda, M. and Damen, W. G. M. (2008). Wnt8 is required for growth-zone establishment and development of opisthosomal segments in a spider. *Curr. Biol.* **18**, 1619-1623. doi:10.1016/j.cub.2008.08.045
- Meinhardt, H. (1982). *Models of Biological Pattern Formation*. Academic Press.
- Misof, B., Liu, S., Meusemann, K., Peters, R. S., Donath, A., Mayer, C., Frandsen, P. B., Ware, J., Flouri, T., Beutel, R. G. et al. (2014). Phylogenomics resolves the timing and pattern of insect evolution. *Science* **346**, 763-767. doi:10.1126/science.1257570
- Mito, T., Sarashina, I., Zhang, H., Iwahashi, A., Okamoto, H., Miyawaki, K., Shinmyo, Y., Ohuchi, H. and Noji, S. (2005). Non-canonical functions of hunchback in segment patterning of the intermediate germ cricket *Gryllus bimaculatus*. *Development* **132**, 2069-2079. doi:10.1242/dev.01784
- Mito, T., Kobayashi, C., Sarashina, I., Zhang, H., Shinahara, W., Miyawaki, K., Shinmyo, Y., Ohuchi, H. and Noji, S. (2007). even-skipped has gap-like, pair-rule-like, and segmental functions in the cricket *Gryllus bimaculatus*, a basal, intermediate germ insect (Orthoptera). *Dev. Biol.* **303**, 202-213. doi:10.1016/j.ydbio.2006.11.003
- Mito, T., Shinmyo, Y., Kurita, K., Nakamura, T., Ohuchi, H. and Noji, S. (2011). Ancestral functions of Delta/Notch signaling in the formation of body and leg segments in the cricket *Gryllus bimaculatus*. *Development* **138**, 3823-3833. doi:10.1242/dev.060681
- Miyawaki, K., Mito, T., Sarashina, I., Zhang, H., Shinmyo, Y., Ohuchi, H. and Noji, S. (2004). Involvement of Wingless/Armado signaling in the posterior sequential segmentation in the cricket, *Gryllus bimaculatus* (Orthoptera), as revealed by RNAi analysis. *Mech. Dev.* **121**, 119-130. doi:10.1016/j.mod.2004.01.002
- Morelli, L. G., Ares, S., Herrgen, L., Schröter, C., Jülicher, F. and Oates, A. C. (2009). Delayed coupling theory of vertebrate segmentation. *HFSP J.* **3**, 55-66. doi:10.2976/1.3027088
- Murgan, S., Kari, W., Rothbacher, U., Iché-Torres, M., Méléneq, P., Hobert, O. and Bertrand, V. (2015). Atypical transcriptional activation by TCF via a Zic transcription factor in *C. elegans* neuronal precursors. *Dev. Cell* **33**, 737-745. doi:10.1016/j.devcel.2015.04.018
- Nakamoto, A., Hester, S. D., Constantinou, S. J., Blaine, W. G., Tewksbury, A. B., Matei, M. T., Nagy, L. M. and Williams, T. A. (2015). Changing cell behaviours during beetle embryogenesis correlates with slowing of segmentation. *Nat. Commun.* **6**, 6635. doi:10.1038/ncomms7635
- Nakao, H. (2010). Characterization of Bombyx embryo segmentation process: expression profiles of engrailed, even-skipped, caudal, and wnt1/wingless homologues. *J. Exp. Zool. B Mol. Dev. Evol.* **314B**, 224-231. doi:10.1002/jezb.21328
- Nakao, H. (2015). Analyses of interactions among pair-rule genes and the gap gene Krüppel in Bombyx segmentation. *Dev. Biol.* **405**, 149-157. doi:10.1016/j.ydbio.2015.06.012
- Nakao, H. (2016). Hunchback knockdown induces supernumerary segment formation in Bombyx. *Dev. Biol.* **413**, 207-216. doi:10.1016/j.ydbio.2016.03.024
- Nakao, H. (2018). A Bombyx homolog of ovo is a segmentation gene that acts downstream of Bm-wnt1 (Bombyx wnt1 homolog). *Gene Expr. Patterns* **27**, 1-7. doi:10.1016/j.gexp.2017.10.002
- Nasiadka, A., Dietrich, B. H. and Krause, H. M. (2002). Anterior-posterior patterning in the Drosophila embryo. In *Advances in Developmental Biology and Biochemistry, Gene Expression at the Beginning of Animal Development* (ed. M. L. DePamphilis), pp. 155-204. Elsevier.
- Nüsslein-Volhard, C. and Wieschaus, E. (1980). Mutations affecting segment number and polarity in Drosophila. *Nature* **287**, 795. doi:10.1038/287795a0
- Oates, A. C., Morelli, L. G. and Ares, S. (2012). Patterning embryos with oscillations: structure, function and dynamics of the vertebrate segmentation clock. *Development* **139**, 625-639. doi:10.1242/dev.063735
- Oberhofer, G., Grossmann, D., Siemanowski, J. L., Beissbarth, T. and Bucher, G. (2014). Wnt/β-catenin signaling integrates patterning and metabolism of the insect growth zone. *Development* **141**, 4740-4750. doi:10.1242/dev.112797
- Oda, H., Nishimura, O., Hirao, Y., Tarui, H., Agata, K. and Akiyama-Oda, Y. (2007). Progressive activation of Delta-Notch signaling from around the blastopore is required to set up a functional caudal lobe in the spider *Achaearanea tepidariorum*. *Development* **134**, 2195-2205. doi:10.1242/dev.004598
- Paese, C. L. B., Schoenauer, A., Leite, D. J., Russell, S. and McGregor, A. P. (2018). A SoxB gene acts as an anterior gap gene and regulates posterior segment addition in a spider. *eLife* **7**, e37567. doi:10.7554/eLife.37567
- Paré, A. C., Vichas, A., Fincher, C. T., Mirman, Z., Farrell, D. L., Mainieri, A. and Zallen, J. A. (2014). A positional Toll receptor code directs convergent extension in Drosophila. *Nature* **515**, 523-527. doi:10.1038/nature13953
- Patel, N. H., Condrón, B. G. and Zinn, K. (1994). Pair-rule expression patterns of even-skipped are found in both short- and long-germ beetles. *Nature* **367**, 429. doi:10.1038/367429a0
- Pechmann, M., Khadjeh, S., Turetzek, N., McGregor, A. P., Damen, W. G. M. and Prpic, N.-M. (2011). Novel function of distal-less as a gap gene during spider segmentation. *PLoS Genet.* **7**, e1002342. doi:10.1371/journal.pgen.1002342
- Peel, A. and Akam, M. (2003). Evolution of segmentation: rolling back the clock. *Curr. Biol.* **13**, R708-R710. doi:10.1016/j.cub.2003.08.045
- Peel, A. D., Chipman, A. D. and Akam, M. (2005). Arthropod segmentation: beyond the Drosophila paradigm. *Nat. Rev. Genet.* **6**, 905-916. doi:10.1038/nrg1724
- Pick, L. (2016). Hox genes, evo-devo, and the case of the ftz gene. *Chromosoma* **125**, 535-551. doi:10.1007/s00412-015-0553-6
- Posnien, N., Schinko, J. B., Kittelmann, S. and Bucher, G. (2010). Genetics, development and composition of the insect head – a beetle's view. *Arthropod Struct. Dev. Evol. Pattern. Mech.* **39**, 399-410. doi:10.1016/j.asd.2010.08.002
- Pourebrahim, R., Houtmeyers, R., Ghogomu, S., Janssens, S., Thelie, A., Tran, H. T., Langenberg, T., Vleminckx, K., Bellefroid, E., Cassiman, J.-J. et al. (2011). Transcription factor Zic2 inhibits Wnt/β-catenin protein signaling. *J. Biol. Chem.* **286**, 37732-37740. doi:10.1074/jbc.M111.242826
- Prud'homme, B., de Rosa, R., Arendt, D., Julien, J.-F., Pajazit, R., Dorresteijn, A. W. C., Adoutte, A., Wittbrodt, J. and Balavoine, G. (2003). Arthropod-like expression patterns of engrailed and wingless in the annelid *Platynereis dumerilii* suggest a role in segment formation. *Curr. Biol.* **13**, 1876-1881. doi:10.1016/j.cub.2003.10.006
- Pueyo, J. I., Lanfear, R. and Couso, J. P. (2008). Ancestral Notch-mediated segmentation revealed in the cockroach *Periplaneta americana*. *Proc. Natl. Acad. Sci. USA* **105**, 16614-16619. doi:10.1073/pnas.0804093105
- Reding, K., Chen, M., Lu, Y., Cheatle Jarvela, A. M. and Pick, L. (2019). Shifting roles of Drosophila pair-rule gene orthologs: segmental expression and function in the milkweed bug *Oncopeltus fasciatus*. *Development* **146**, dev181453. doi:10.1242/dev.181453
- Richmond, D. L. and Oates, A. C. (2012). The segmentation clock: inherited trait or universal design principle? *Curr. Opin. Genet. Dev.* **22**, 600-606. doi:10.1016/j.gde.2012.10.003
- Rohr, K. B., Tautz, D. and Sander, K. (1999). Segmentation gene expression in the mothmidge *Clugia albipunctata* (Diptera, psychodidae) and other primitive dipterans. *Dev. Genes Evol.* **209**, 145-154. doi:10.1007/s004270050238
- Rosenberg, M. I., Brent, A. E., Payre, F. and Desplan, C. (2014). Dual mode of embryonic evolution is highlighted by expression and function of *Nasonia* pair-rule genes. *eLife* **3**, e01440. doi:10.7554/eLife.01440
- Rothschild, J. B., Tsimiklis, P., Siggia, E. D. and François, P. (2016). Predicting ancestral segmentation phenotypes from Drosophila to anopheles using in silico evolution. *PLoS Genet.* **12**, e1006052. doi:10.1371/journal.pgen.1006052
- Salazar-Ciudad, I., Newman, S. A. and Solé, R. V. (2001). Phenotypic and dynamical transitions in model genetic networks I. Emergence of patterns and genotype-phenotype relationships. *Evol. Dev.* **3**, 84-94. doi:10.1046/j.1525-142x.2001.003002084.x
- Samee, M. A. H., Lydiard-Martin, T., Biette, K. M., Vincent, B. J., Bragdon, M. D., Eckenrode, K. B., Wunderlich, Z., Estrada, J., Sinha, S. and DePace, A. H. (2017). Quantitative measurement and thermodynamic modeling of fused enhancers support a two-tiered mechanism for interpreting regulatory DNA. *Cell Rep.* **21**, 236-245. doi:10.1016/j.celrep.2017.09.033
- Sander, K. (1976). Specification of the basic body pattern in insect embryogenesis. *Adv. Insect Physiol.* **12**, 125-238. doi:10.1016/S0065-2806(08)60255-6
- Sarrazin, A. F., Peel, A. D. and Averof, M. (2012). A segmentation clock with two-segment periodicity in insects. *Science* **336**, 338-341. doi:10.1126/science.1218256
- Scholtz, G. (1992). Cell lineage studies in the crayfish *Cherax destructor* (Crustacea, Decapoda): germ band formation, segmentation, and early neurogenesis. *Roux Arch. Dev. Biol.* **202**, 36-48. doi:10.1007/BF00364595
- Schönauer, A., Paese, C. L. B., Hilbrant, M., Leite, D. J., Schwager, E. E., Feitosa, N. M., Eibner, C., Damen, W. G. M. and McGregor, A. P. (2016). The Wnt and Delta-Notch signalling pathways interact to direct pair-rule gene

- expression via caudal during segment addition in the spider *Parasteatoda tepidariorum*. *Development* **143**, 2455-2463. doi:10.1242/dev.131656
- Schoppmeier, M. and Damen, W. G. M.** (2005a). Expression of Pax group III genes suggests a single-segmental periodicity for opisthosomal segment patterning in the spider *Cupiennius salei*. *Evol. Dev.* **7**, 160-169. doi:10.1111/j.1525-142X.2005.05018.x
- Schoppmeier, M. and Damen, W. G. M.** (2005b). Suppressor of Hairless and Presenilin phenotypes imply involvement of canonical Notch-signalling in segmentation of the spider *Cupiennius salei*. *Dev. Biol.* **280**, 211-224. doi:10.1016/j.ydbio.2005.01.024
- Schroeder, M. D., Greer, C. and Gaul, U.** (2011). How to make stripes: deciphering the transition from non-periodic to periodic patterns in *Drosophila* segmentation. *Development* **138**, 3067-3078. doi:10.1242/dev.062141
- Schröter, C., Ares, S., Morelli, L. G., Isakova, A., Hens, K., Soroldoni, D., Gajewski, M., Jülicher, F., Maerkl, S. J., Deplancke, B. et al.** (2012). Topology and dynamics of the Zebrafish segmentation clock core circuit. *PLoS Biol.* **10**, e1001364. doi:10.1371/journal.pbio.1001364
- Schulz, C., Schröder, R., Hausdorf, B., Wolff, C. and Tautz, D.** (1998). A caudal homologue in the short germ band beetle *Tribolium* shows similarities to both, the *Drosophila* and the vertebrate caudal expression patterns. *Dev. Genes Evol.* **208**, 283-289. doi:10.1007/s004270050183
- Schwager, E.** (2008). Segmentation of the spider *Achaearanea tepidariorum* investigated by gene expression and functional analysis of the gap gene hunchback. *PhD thesis*, Universität zu Köln.
- Schwager, E. E., Pechmann, M., Feitosa, N. M., McGregor, A. P. and Damen, W. G. M.** (2009). hunchback functions as a segmentation gene in the spider *Achaearanea tepidariorum*. *Curr. Biol. CB* **19**, 1333-1340. doi:10.1016/j.cub.2009.06.061
- Schwentner, M., Combosch, D. J., Nelson, J. P. and Giribet, G.** (2017). A phylogenomic solution to the origin of insects by resolving crustacean-hexapod relationships. *Curr. Biol.* **27**, 1818-1824.e5. doi:10.1016/j.cub.2017.05.040
- Seaver, E. C. and Kaneshige, L. M.** (2006). Expression of "segmentation" genes during larval and juvenile development in the polychaetes *Capitella* sp. I and *H. elegans*. *Dev. Biol.* **289**, 179-194. doi:10.1016/j.ydbio.2005.10.025
- Seaver, E. C., Paulson, D. A., Irvine, S. Q. and Martindale, M. Q.** (2001). The spatial and temporal expression of Ch-en, the engrailed gene in the polychaete *Chaetopterus*, does not support a role in body axis segmentation. *Dev. Biol.* **236**, 195-209. doi:10.1006/dbio.2001.0309
- Sharpe, J.** (2017). Computer modeling in developmental biology: growing today, essential tomorrow. *Development* **144**, 4214-4225. doi:10.1242/dev.151274
- Shinmyo, Y., Mito, T., Matsushita, T., Sarashina, I., Miyawaki, K., Ohuchi, H. and Noji, S.** (2005). caudal is required for gnathal and thoracic patterning and for posterior elongation in the intermediate-germband cricket *Gryllus bimaculatus*. *Mech. Dev.* **122**, 231-239. doi:10.1016/j.mod.2004.10.001
- Soroldoni, D., Jörg, D. J., Morelli, L. G., Richmond, D. L., Schindelin, J., Jülicher, F. and Oates, A. C.** (2014). A Doppler effect in embryonic pattern formation. *Science* **345**, 222-225. doi:10.1126/science.1253089
- Stahi, R. and Chipman, A. D.** (2016). Blastoderm segmentation in *Oncopeltus fasciatus* and the evolution of insect segmentation mechanisms. *Proc. R. Soc. B Biol. Sci.* **283**, 20161745. doi:10.1098/rspb.2016.1745
- Steventon, B., Duarte, F., Lagadec, R., Mazan, S., Nicolas, J.-F. and Hirsinger, E.** (2016). Species-specific contribution of volumetric growth and tissue convergence to posterior body elongation in vertebrates. *Development* **143**, 1732-1741. doi:10.1242/dev.126375
- Stollewerk, A., Schoppmeier, M. and Damen, W. G. M.** (2003). Involvement of Notch and Delta genes in spider segmentation. *Nature* **423**, 863-865. doi:10.1038/nature01682
- Stuart, J. J., Brown, S. J., Beeman, R. W. and Denell, R. E.** (1991). A deficiency of the homeotic complex of the beetle *Tribolium*. *Nature* **350**, 72. doi:10.1038/350072a0
- Sucena, É., Vanderberghe, K., Zhurov, V. and Grbić, M.** (2014). Reversion of developmental mode in insects: evolution from long germband to short germband in the polyembryonic wasp *Macrocentrus cingulum* Brischke. *Evol. Dev.* **16**, 233-246. doi:10.1111/ede.12086
- Surkova, S., Kosman, D., Kozlov, K., Manu, Myasnikova, E., Samsonova, A. A., Spirov, A., Vanario-Alonso, C. E., Samsonova, M. and Reinitz, J.** (2008). Characterization of the *Drosophila* segment determination morphome. *Dev. Biol.* **313**, 844-862. doi:10.1016/j.ydbio.2007.10.037
- Vedel, V., Chipman, A. D., Akam, M. and Arthur, W.** (2008). Temperature-dependent plasticity of segment number in an arthropod species: the centipede *Strigamia maritima*. *Evol. Dev.* **10**, 487-492. doi:10.1111/j.1525-142X.2008.00259.x
- Vedel, V., Apostolou, Z., Arthur, W., Akam, M. and Brena, C.** (2010). An early temperature-sensitive period for the plasticity of segment number in the centipede *Strigamia maritima*. *Evol. Dev.* **12**, 347-352. doi:10.1111/j.1525-142X.2010.00421.x
- Vellutini, B. C. and Hejnal, A.** (2016). Expression of segment polarity genes in brachiopods supports a non-segmental ancestral role of *engrailed* for bilaterians. *Sci. Rep.* **6**, 32387. doi:10.1038/srep32387
- Verd, B., Crombach, A. and Jaeger, J.** (2014). Classification of transient behaviours in a time-dependent toggle switch model. *BMC Syst. Biol.* **8**, 43. doi:10.1186/1752-0509-8-43
- Verd, B., Clark, E., Wotton, K. R., Janssens, H., Jiménez-Guri, E., Crombach, A. and Jaeger, J.** (2018). A damped oscillator imposes temporal order on posterior gap gene expression in *Drosophila*. *PLoS Biol.* **16**, e2003174. doi:10.1371/journal.pbio.2003174
- Vroomans, R. M. A., Hogeweg, P. and Ten Tusscher, K. H. W. J.** (2016). In silico evo-devo: reconstructing stages in the evolution of animal segmentation. *EvoDevo* **7**, 14. doi:10.1186/s13227-016-0052-8
- Vroomans, R. M. A., Hogeweg, P. and ten Tusscher, K. H. W. J.** (2018). Around the clock: gradient shape and noise impact the evolution of oscillatory segmentation dynamics. *EvoDevo* **9**, 24. doi:10.1186/s13227-018-0113-2
- Williams, T. A. and Nagy, L. M.** (2017). Linking gene regulation to cell behaviors in the posterior growth zone of sequentially segmenting arthropods. *Arthropod Struct. Dev.* **46**, 380-394. doi:10.1016/j.asd.2016.10.003
- Williams, T., Blachuta, B., Hegna, T. A. and Nagy, L. M.** (2012). Decoupling elongation and segmentation: notch involvement in anostracan crustacean segmentation. *Evol. Dev.* **14**, 372-382. doi:10.1111/j.1525-142X.2012.00555.x
- Wilson, M. J., McKelvey, B. H., van der Heide, S. and Dearden, P. K.** (2010). Notch signaling does not regulate segmentation in the honeybee, *Apis mellifera*. *Dev. Genes Evol.* **220**, 179-190. doi:10.1007/s00427-010-0340-6
- Wolff, C., Tinevez, J.-Y., Pietzsch, T., Stamatakis, E., Harich, B., Guignard, L., Preibisch, S., Shorte, S., Keller, P. J., Tomancak, P. et al.** (2018). Multi-view light-sheet imaging and tracking with the MaMuT software reveals the cell lineage of a direct developing arthropod limb. *eLife* **7**, e34410. doi:10.7554/eLife.34410
- Xiang, J., Reding, K., Heffer, A. and Pick, L.** (2017). Conservation and variation in pair-rule gene expression and function in the intermediate-germ beetle *Dermestes maculatus*. *Development* **144**, 4625-4636. doi:10.1242/dev.154039
- Xu, J. and Gridley, T.** (2012). Notch signalling during oogenesis in *Drosophila melanogaster*. *Genet. Res. Int.* **2012**, 648207. doi:10.1155/2012/648207
- Zheng, L., Michelson, Y., Freger, V., Avraham, Z., Venken, K. J. T., Bellen, H. J., Justice, M. J. and Wides, R.** (2011). *Drosophila* Ten-m and filamin affect motor neuron growth cone guidance. *PLoS ONE* **6**, e22956. doi:10.1371/journal.pone.0022956
- Zhu, X., Rudolf, H., Healey, L., François, P., Brown, S. J., Klingler, M. and El-Sherif, E.** (2017). Speed regulation of genetic cascades allows for evolvability in the body plan specification of insects. *Proc. Natl. Acad. Sci. USA* **2017**, E8646-E8655. doi:10.1073/pnas.1702478114
